# Supplementary material for: Automated Pavement Crack Damage Detection Using Deep Multiscale Convolutional Features
Source: Hindawi journal article supplement (doi:10.1155/2020/6412562), 2020-01-08
Supplement: f1 [file 6412562.f1.zip]

Archive with 452 entries (450 files):
- CrackDataset/groundtruth/
- CrackDataset/groundtruth/0000000001.png
- CrackDataset/groundtruth/0000000002.png
- CrackDataset/groundtruth/0000000003.png
- CrackDataset/groundtruth/0000000004.png
- CrackDataset/groundtruth/0000000005.png
- CrackDataset/groundtruth/0000000006.png
- CrackDataset/groundtruth/0000000007.png
- CrackDataset/groundtruth/0000000008.png
- CrackDataset/groundtruth/0000000009.png
- CrackDataset/groundtruth/000000001.png
- CrackDataset/groundtruth/0000000010.png
- CrackDataset/groundtruth/0000000011.png
- CrackDataset/groundtruth/0000000012.png
- CrackDataset/groundtruth/0000000013.png
- CrackDataset/groundtruth/0000000014.png
- CrackDataset/groundtruth/0000000015.png
- CrackDataset/groundtruth/0000000016.png
- CrackDataset/groundtruth/0000000017.png
- CrackDataset/groundtruth/0000000018.png
- CrackDataset/groundtruth/0000000019.png
- CrackDataset/groundtruth/000000002.png
- CrackDataset/groundtruth/0000000020.png
- CrackDataset/groundtruth/0000000021.png
- CrackDataset/groundtruth/0000000022.png
- CrackDataset/groundtruth/0000000023.png
- CrackDataset/groundtruth/0000000024.png
- CrackDataset/groundtruth/0000000025.png
- CrackDataset/groundtruth/0000000026.png
- CrackDataset/groundtruth/0000000027.png
- CrackDataset/groundtruth/0000000028.png
- CrackDataset/groundtruth/0000000029.png
- CrackDataset/groundtruth/000000003.png
- CrackDataset/groundtruth/0000000030.png
- CrackDataset/groundtruth/0000000031.png
- CrackDataset/groundtruth/0000000032.png
- CrackDataset/groundtruth/0000000033.png
- CrackDataset/groundtruth/0000000034.png
- CrackDataset/groundtruth/0000000035.png
- CrackDataset/groundtruth/0000000036.png
- CrackDataset/groundtruth/0000000039.png
- CrackDataset/groundtruth/000000004.png
- CrackDataset/groundtruth/0000000040.png
- CrackDataset/groundtruth/0000000041.png
- CrackDataset/groundtruth/0000000042.png
- CrackDataset/groundtruth/0000000043.png
- CrackDataset/groundtruth/0000000044.png
- CrackDataset/groundtruth/0000000045.png
- CrackDataset/groundtruth/0000000046.png
- CrackDataset/groundtruth/0000000047.png
- CrackDataset/groundtruth/0000000048.png
- CrackDataset/groundtruth/0000000049.png
- CrackDataset/groundtruth/000000005.png
- CrackDataset/groundtruth/0000000050.png
- CrackDataset/groundtruth/0000000051.png
- CrackDataset/groundtruth/0000000052.png
- CrackDataset/groundtruth/0000000053.png
- CrackDataset/groundtruth/0000000054.png
- CrackDataset/groundtruth/0000000055.png
- CrackDataset/groundtruth/0000000056.png
- CrackDataset/groundtruth/0000000057.png
- CrackDataset/groundtruth/0000000058.png
- CrackDataset/groundtruth/0000000059.png
- CrackDataset/groundtruth/000000006.png
- CrackDataset/groundtruth/0000000060.png
- CrackDataset/groundtruth/0000000061.png
- CrackDataset/groundtruth/0000000062.png
- CrackDataset/groundtruth/0000000063.png
- CrackDataset/groundtruth/0000000064.png
- CrackDataset/groundtruth/0000000065.png
- CrackDataset/groundtruth/0000000066.png
- CrackDataset/groundtruth/0000000067.png
- CrackDataset/groundtruth/0000000068.png
- CrackDataset/groundtruth/0000000069.png
- CrackDataset/groundtruth/000000007.png
- CrackDataset/groundtruth/0000000070.png
- CrackDataset/groundtruth/0000000071.png
- CrackDataset/groundtruth/0000000072.png
- CrackDataset/groundtruth/0000000073.png
- CrackDataset/groundtruth/0000000074.png
- CrackDataset/groundtruth/0000000075.png
- CrackDataset/groundtruth/0000000076.png
- CrackDataset/groundtruth/000000008.png
- CrackDataset/groundtruth/000000009.png
- CrackDataset/groundtruth/000000010.png
- CrackDataset/groundtruth/000000011.png
- CrackDataset/groundtruth/000000012.png
- CrackDataset/groundtruth/000000013.png
- CrackDataset/groundtruth/000000014.png
- CrackDataset/groundtruth/000000015.png
- CrackDataset/groundtruth/000000016.png
- CrackDataset/groundtruth/000000017.png
- CrackDataset/groundtruth/000000018.png
- CrackDataset/groundtruth/000000019.png
- CrackDataset/groundtruth/000000020.png
- CrackDataset/groundtruth/000000021.png
- CrackDataset/groundtruth/000000022.png
- CrackDataset/groundtruth/000000023.png
- CrackDataset/groundtruth/000000024.png
- CrackDataset/groundtruth/000000025.png
- CrackDataset/groundtruth/000000026.png
- CrackDataset/groundtruth/000000027.png
- CrackDataset/groundtruth/000000028.png
- CrackDataset/groundtruth/000000029.png
- CrackDataset/groundtruth/000000030.png
- CrackDataset/groundtruth/000000031.png
- CrackDataset/groundtruth/000000032.png
- CrackDataset/groundtruth/000000033.png
- CrackDataset/groundtruth/000000034.png
- CrackDataset/groundtruth/000000035.png
- CrackDataset/groundtruth/000000036.png
- CrackDataset/groundtruth/000000037.png
- CrackDataset/groundtruth/000000038.png
- CrackDataset/groundtruth/000000039.png
- CrackDataset/groundtruth/000000040.png
- CrackDataset/groundtruth/000000041.png
- CrackDataset/groundtruth/000000042.png
- CrackDataset/groundtruth/000000043.png
- CrackDataset/groundtruth/000000044.png
- CrackDataset/groundtruth/000000045.png
- CrackDataset/groundtruth/000000046.png
- CrackDataset/groundtruth/000000047.png
- CrackDataset/groundtruth/000000048.png
- CrackDataset/groundtruth/000000049.png
- CrackDataset/groundtruth/000000050.png
- CrackDataset/groundtruth/000000051.png
- CrackDataset/groundtruth/000000052.png
- CrackDataset/groundtruth/000000053.png
- CrackDataset/groundtruth/000000054.png
- CrackDataset/groundtruth/000000055.png
- CrackDataset/groundtruth/000000056.png
- CrackDataset/groundtruth/000000057.png
- CrackDataset/groundtruth/000000058.png
- CrackDataset/groundtruth/000000059.png
- CrackDataset/groundtruth/000000060.png
- CrackDataset/groundtruth/000000061.png
- CrackDataset/groundtruth/000000062.png
- CrackDataset/groundtruth/000000063.png
- CrackDataset/groundtruth/000000064.png
- CrackDataset/groundtruth/000000065.png
- CrackDataset/groundtruth/000000066.png
- CrackDataset/groundtruth/000000067.png
- CrackDataset/groundtruth/000000068.png
- CrackDataset/groundtruth/000000069.png
- CrackDataset/groundtruth/000000070.png
- CrackDataset/groundtruth/000000071.png
- CrackDataset/groundtruth/000000072.png
- CrackDataset/groundtruth/000000073.png
- CrackDataset/groundtruth/000000074.png
- CrackDataset/groundtruth/000000075.png
- CrackDataset/groundtruth/000000076.png
- CrackDataset/groundtruth/000001.png
- CrackDataset/groundtruth/0000016.png
- CrackDataset/groundtruth/000002.png
- CrackDataset/groundtruth/0000026.png
- CrackDataset/groundtruth/000003.png
- CrackDataset/groundtruth/000004.png
- CrackDataset/groundtruth/0000046.png
- CrackDataset/groundtruth/000005.png
- CrackDataset/groundtruth/0000056.png
- CrackDataset/groundtruth/000006.png
- CrackDataset/groundtruth/0000066.png
- CrackDataset/groundtruth/000007.png
- CrackDataset/groundtruth/0000076.png
- CrackDataset/groundtruth/000008.png
- CrackDataset/groundtruth/000009.png
- CrackDataset/groundtruth/000010.png
- CrackDataset/groundtruth/000011.png
- CrackDataset/groundtruth/000012.png
- CrackDataset/groundtruth/000013.png
- CrackDataset/groundtruth/000014.png
- CrackDataset/groundtruth/000015.png
- CrackDataset/groundtruth/000017.png
- CrackDataset/groundtruth/000018.png
- CrackDataset/groundtruth/000019.png
- CrackDataset/groundtruth/000020.png
- CrackDataset/groundtruth/000021.png
- CrackDataset/groundtruth/000022.png
- CrackDataset/groundtruth/000023.png
- CrackDataset/groundtruth/000024.png
- CrackDataset/groundtruth/000025.png
- CrackDataset/groundtruth/000026.png
- CrackDataset/groundtruth/000028.png
- CrackDataset/groundtruth/000029.png
- CrackDataset/groundtruth/000030.png
- CrackDataset/groundtruth/000031.png
- CrackDataset/groundtruth/000032.png
- CrackDataset/groundtruth/000034.png
- CrackDataset/groundtruth/000035.png
- CrackDataset/groundtruth/000036.png
- CrackDataset/groundtruth/000037.png
- CrackDataset/groundtruth/000038.png
- CrackDataset/groundtruth/000039.png
- CrackDataset/groundtruth/000040.png
- CrackDataset/groundtruth/000041.png
- CrackDataset/groundtruth/000042.png
- CrackDataset/groundtruth/000043.png
- CrackDataset/groundtruth/000044.png
- CrackDataset/groundtruth/000045.png
- CrackDataset/groundtruth/000046.png
- CrackDataset/groundtruth/000047.png
- CrackDataset/groundtruth/000048.png
- CrackDataset/groundtruth/000049.png
- CrackDataset/groundtruth/000050.png
- CrackDataset/groundtruth/000051.png
- CrackDataset/groundtruth/000052.png
- CrackDataset/groundtruth/000053.png
- CrackDataset/groundtruth/000054.png
- CrackDataset/groundtruth/000055.png
- CrackDataset/groundtruth/000056.png
- CrackDataset/groundtruth/000057.png
- CrackDataset/groundtruth/000058.png
- CrackDataset/groundtruth/000060.png
- CrackDataset/groundtruth/000061.png
- CrackDataset/groundtruth/000062.png
- CrackDataset/groundtruth/000063.png
- CrackDataset/groundtruth/000064.png
- CrackDataset/groundtruth/000065.png
- CrackDataset/groundtruth/000066.png
- CrackDataset/groundtruth/000068.png
- CrackDataset/groundtruth/000069.png
- CrackDataset/groundtruth/000071.png
- CrackDataset/groundtruth/000072.png
- CrackDataset/groundtruth/000073.png
- CrackDataset/groundtruth/000074.png
- CrackDataset/groundtruth/000075.png
- CrackDataset/images/
- CrackDataset/images/0000000001.jpg
- CrackDataset/images/0000000002.jpg
- CrackDataset/images/0000000003.jpg
- CrackDataset/images/0000000004.jpg
- CrackDataset/images/0000000005.jpg
- CrackDataset/images/0000000006.jpg
- CrackDataset/images/0000000007.jpg
- CrackDataset/images/0000000008.jpg
- CrackDataset/images/0000000009.jpg
- CrackDataset/images/000000001.jpg
- CrackDataset/images/0000000010.jpg
- CrackDataset/images/0000000011.jpg
- CrackDataset/images/0000000012.jpg
- CrackDataset/images/0000000013.jpg
- CrackDataset/images/0000000014.jpg
- CrackDataset/images/0000000015.jpg
- CrackDataset/images/0000000016.jpg
- CrackDataset/images/0000000017.jpg
- CrackDataset/images/0000000018.jpg
- CrackDataset/images/0000000019.jpg
- CrackDataset/images/000000002.jpg
- CrackDataset/images/0000000020.jpg
- CrackDataset/images/0000000021.jpg
- CrackDataset/images/0000000022.jpg
- CrackDataset/images/0000000023.jpg
- CrackDataset/images/0000000024.jpg
- CrackDataset/images/0000000025.jpg
- CrackDataset/images/0000000026.jpg
- CrackDataset/images/0000000027.jpg
- CrackDataset/images/0000000028.jpg
- CrackDataset/images/0000000029.jpg
- CrackDataset/images/000000003.jpg
- CrackDataset/images/0000000030.jpg
- CrackDataset/images/0000000031.jpg
- CrackDataset/images/0000000032.jpg
- CrackDataset/images/0000000033.jpg
- CrackDataset/images/0000000034.jpg
- CrackDataset/images/0000000035.jpg
- CrackDataset/images/0000000036.jpg
- CrackDataset/images/0000000039.jpg
- CrackDataset/images/000000004.jpg
- CrackDataset/images/0000000040.jpg
- CrackDataset/images/0000000041.jpg
- CrackDataset/images/0000000042.jpg
- CrackDataset/images/0000000043.jpg
- CrackDataset/images/0000000044.jpg
- CrackDataset/images/0000000045.jpg
- CrackDataset/images/0000000046.jpg
- CrackDataset/images/0000000047.jpg
- CrackDataset/images/0000000048.jpg
- CrackDataset/images/0000000049.jpg
- CrackDataset/images/000000005.jpg
- CrackDataset/images/0000000050.jpg
- CrackDataset/images/0000000051.jpg
- CrackDataset/images/0000000052.jpg
- CrackDataset/images/0000000053.jpg
- CrackDataset/images/0000000054.jpg
- CrackDataset/images/0000000055.jpg
- CrackDataset/images/0000000056.jpg
- CrackDataset/images/0000000057.jpg
- CrackDataset/images/0000000058.jpg
- CrackDataset/images/0000000059.jpg
- CrackDataset/images/000000006.jpg
- CrackDataset/images/0000000060.jpg
- CrackDataset/images/0000000061.jpg
- CrackDataset/images/0000000062.jpg
- CrackDataset/images/0000000063.jpg
- CrackDataset/images/0000000064.jpg
- CrackDataset/images/0000000065.jpg
- CrackDataset/images/0000000066.jpg
- CrackDataset/images/0000000067.jpg
- CrackDataset/images/0000000068.jpg
- CrackDataset/images/0000000069.jpg
[truncated: 152 more entries]
