# Supplementary figures and images for: Automated Pavement Crack Damage Detection Using Deep Multiscale Convolutional Features (part 1 of 2)
Source: Hindawi journal article supplement (doi:10.1155/2020/6412562), 2020-01-08

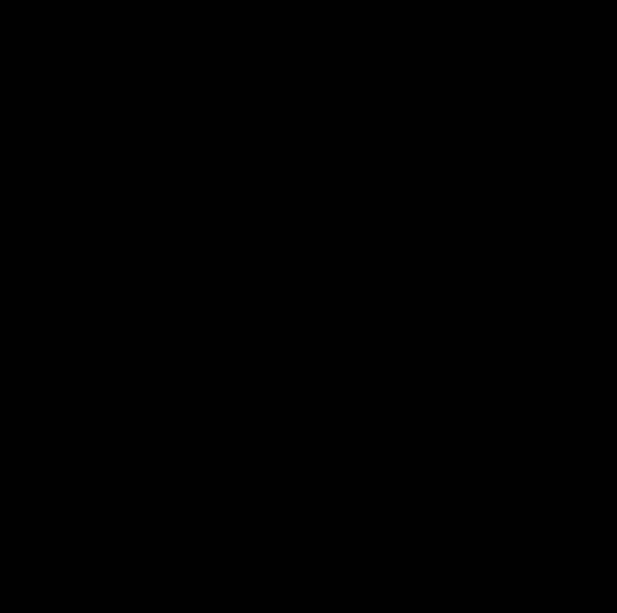

Supplement: f1 [file 6412562.f1.zip › CrackDataset/groundtruth/0000000001.png]

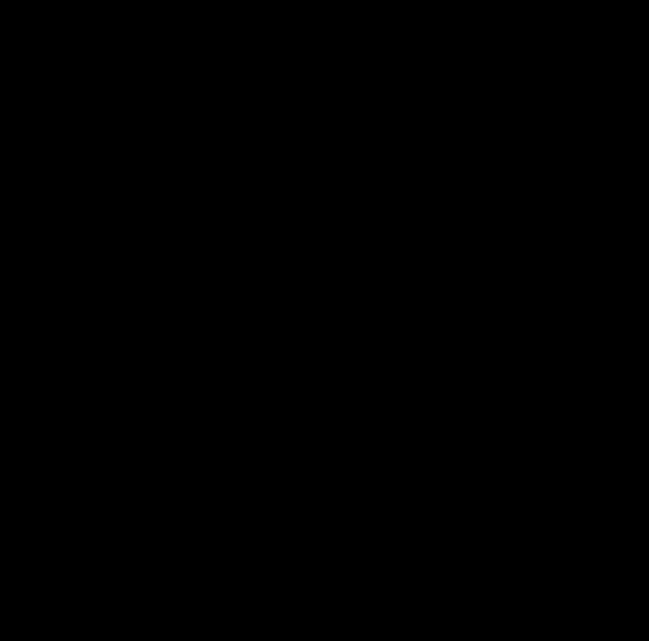

Supplement: f1 [file 6412562.f1.zip › CrackDataset/groundtruth/0000000002.png]

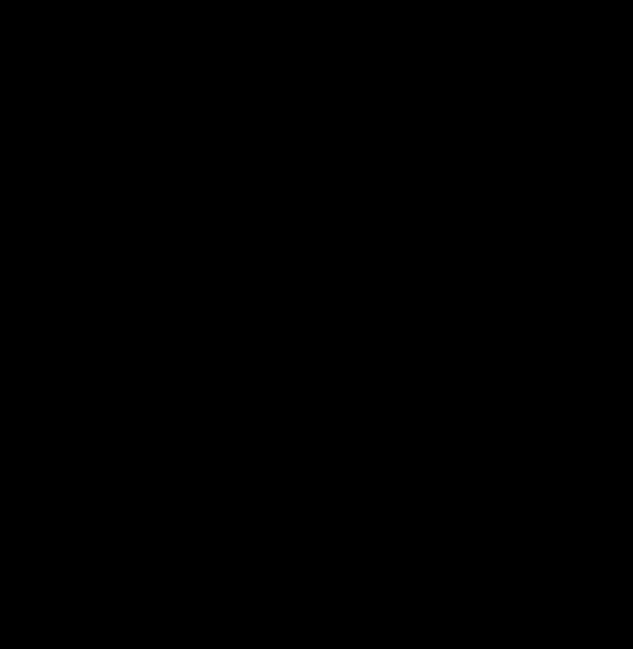

Supplement: f1 [file 6412562.f1.zip › CrackDataset/groundtruth/0000000003.png]

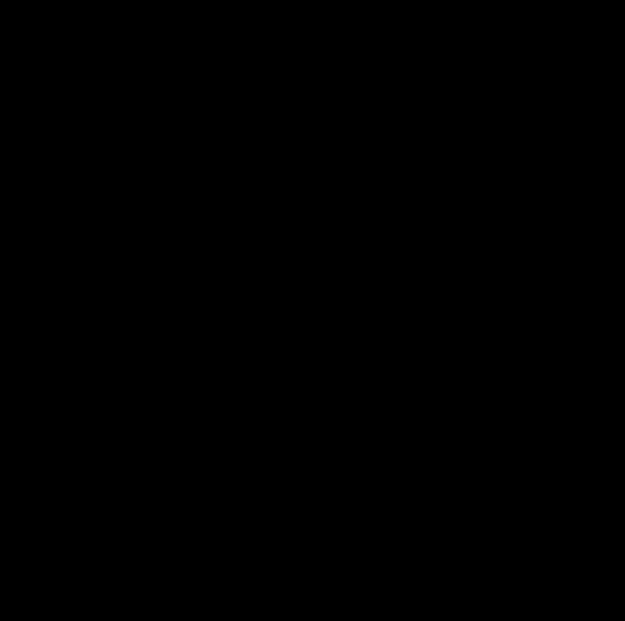

Supplement: f1 [file 6412562.f1.zip › CrackDataset/groundtruth/0000000004.png]

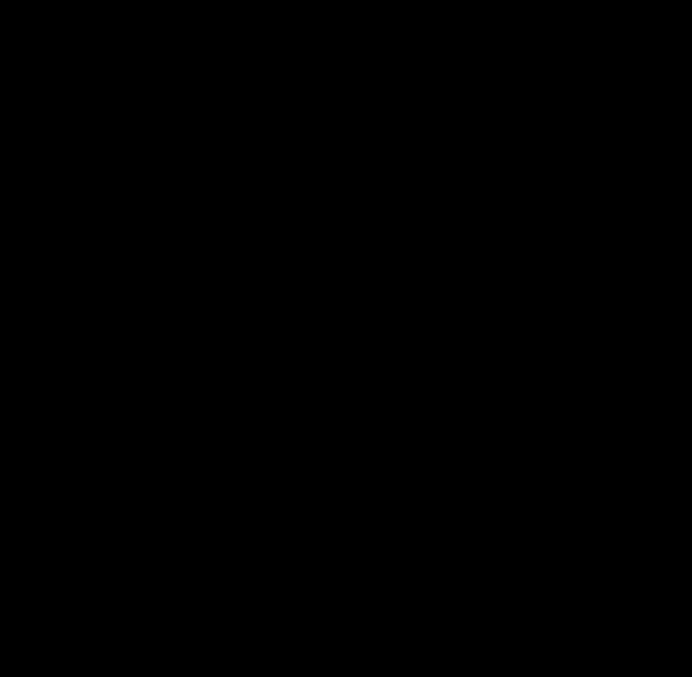

Supplement: f1 [file 6412562.f1.zip › CrackDataset/groundtruth/0000000005.png]

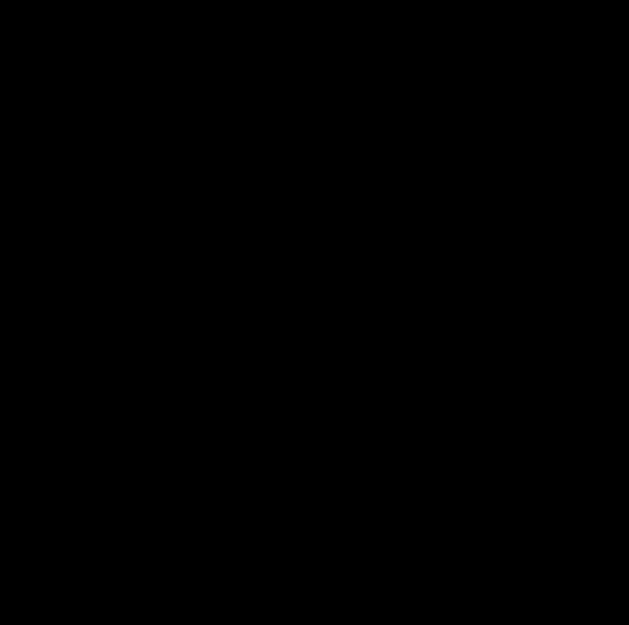

Supplement: f1 [file 6412562.f1.zip › CrackDataset/groundtruth/0000000006.png]

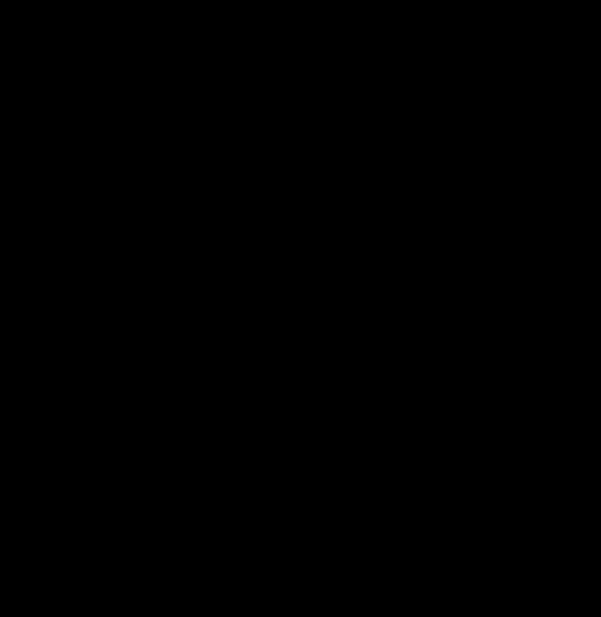

Supplement: f1 [file 6412562.f1.zip › CrackDataset/groundtruth/0000000007.png]

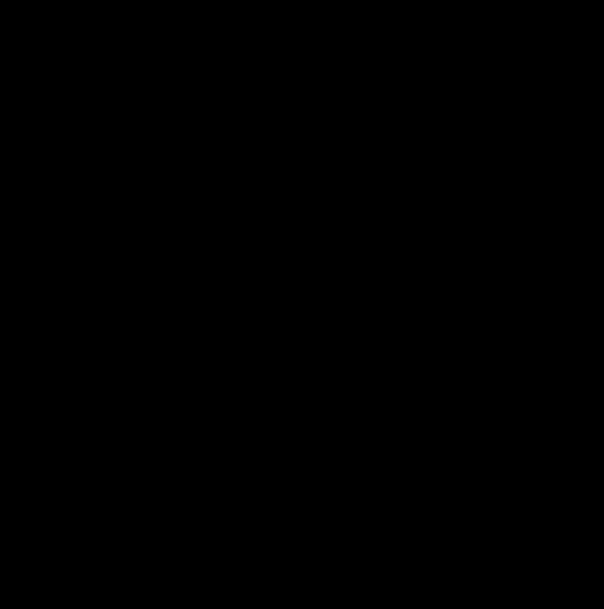

Supplement: f1 [file 6412562.f1.zip › CrackDataset/groundtruth/0000000008.png]

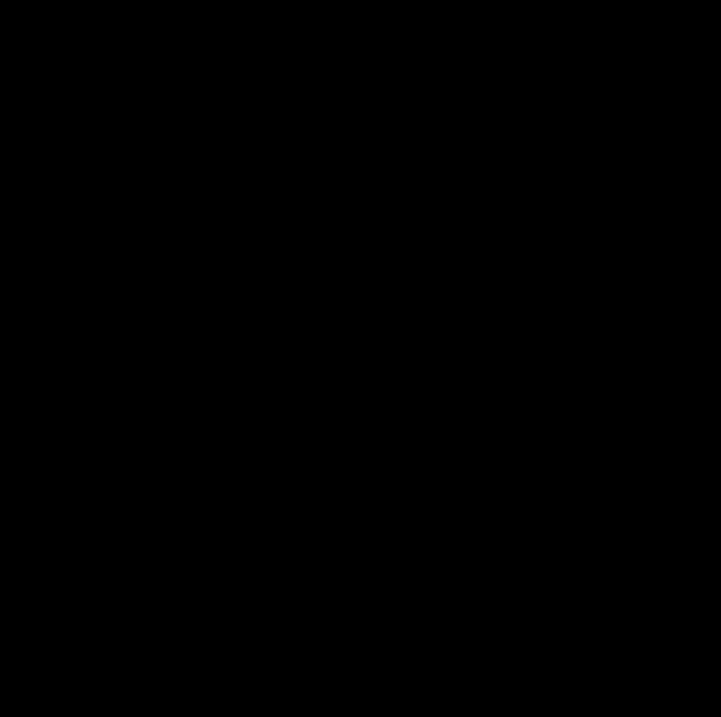

Supplement: f1 [file 6412562.f1.zip › CrackDataset/groundtruth/0000000009.png]

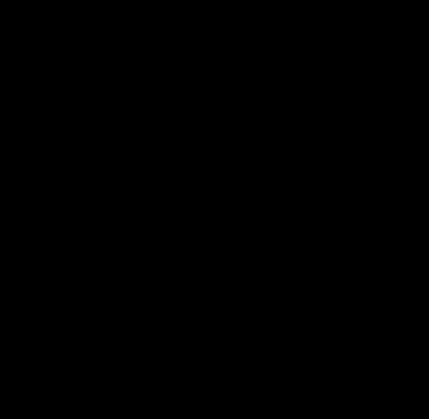

Supplement: f1 [file 6412562.f1.zip › CrackDataset/groundtruth/000000001.png]

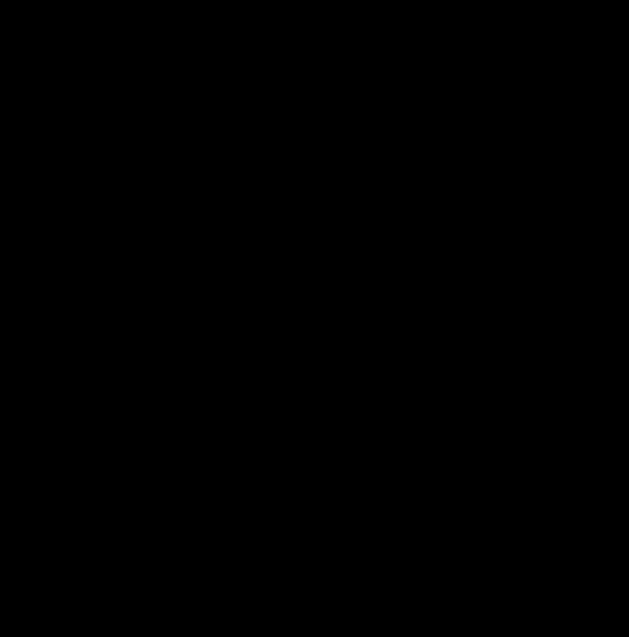

Supplement: f1 [file 6412562.f1.zip › CrackDataset/groundtruth/0000000010.png]

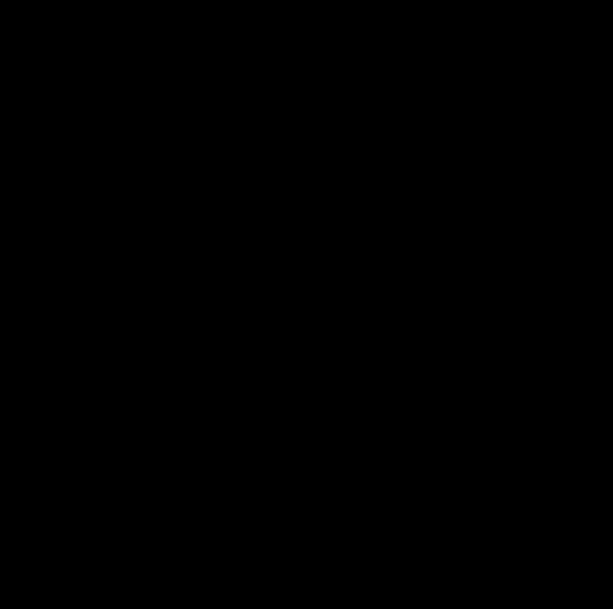

Supplement: f1 [file 6412562.f1.zip › CrackDataset/groundtruth/0000000011.png]

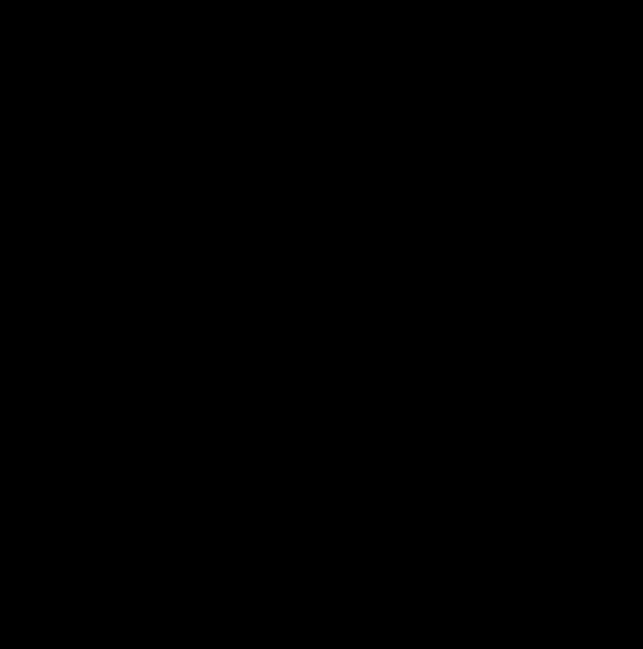

Supplement: f1 [file 6412562.f1.zip › CrackDataset/groundtruth/0000000012.png]

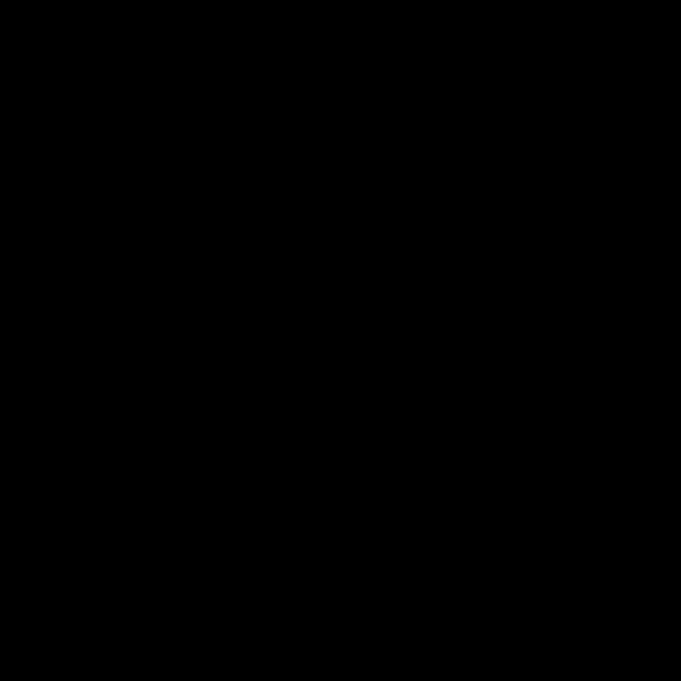

Supplement: f1 [file 6412562.f1.zip › CrackDataset/groundtruth/0000000013.png]

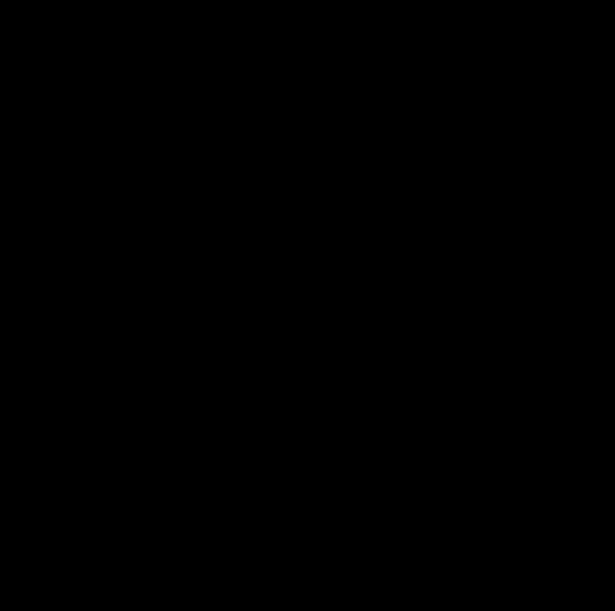

Supplement: f1 [file 6412562.f1.zip › CrackDataset/groundtruth/0000000014.png]

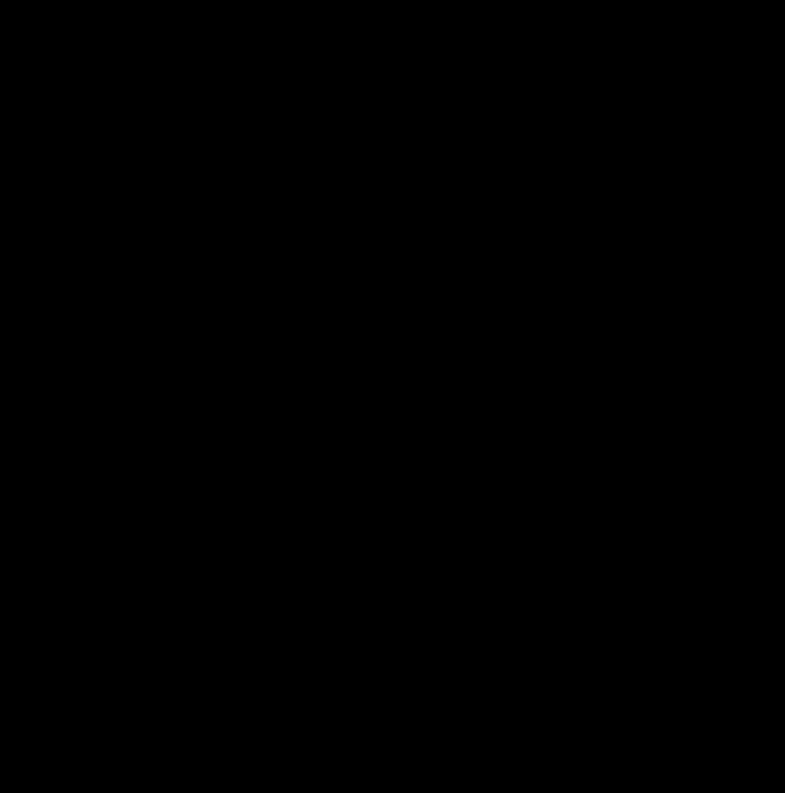

Supplement: f1 [file 6412562.f1.zip › CrackDataset/groundtruth/0000000015.png]

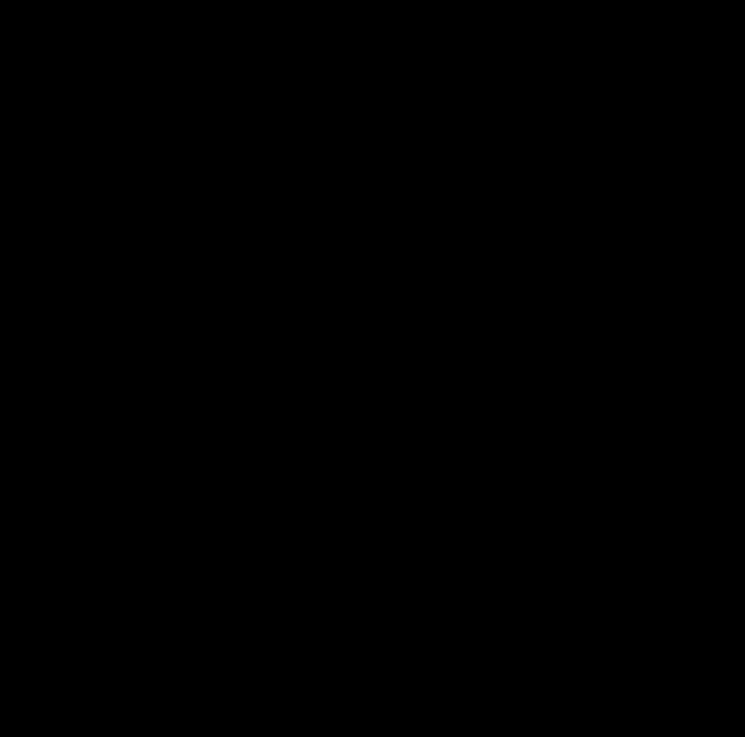

Supplement: f1 [file 6412562.f1.zip › CrackDataset/groundtruth/0000000016.png]

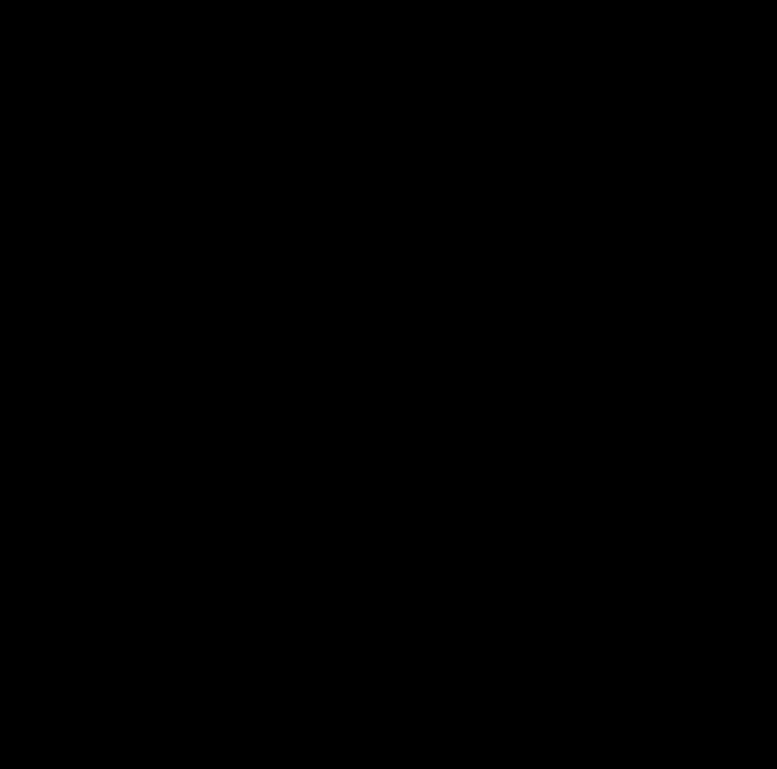

Supplement: f1 [file 6412562.f1.zip › CrackDataset/groundtruth/0000000017.png]

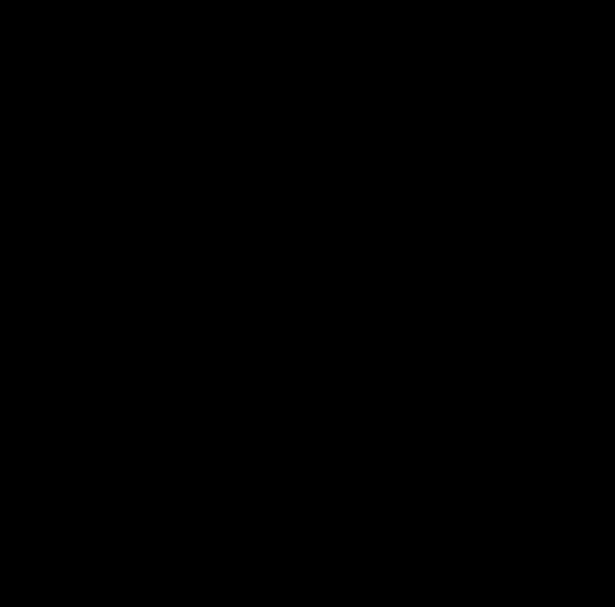

Supplement: f1 [file 6412562.f1.zip › CrackDataset/groundtruth/0000000018.png]

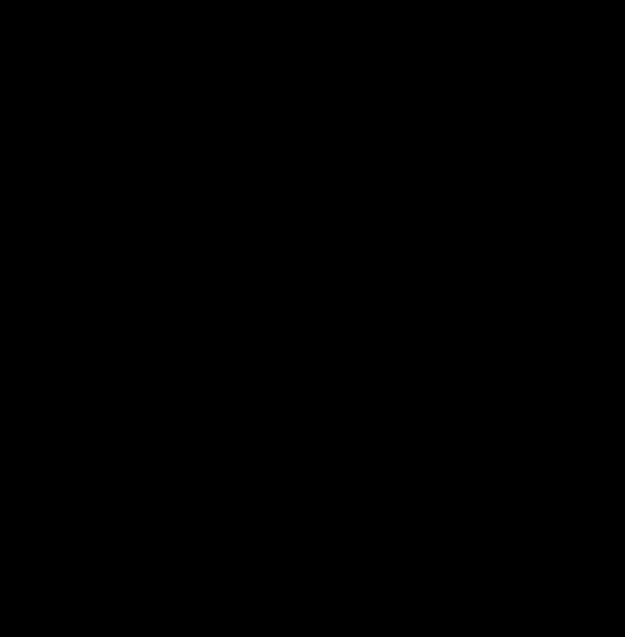

Supplement: f1 [file 6412562.f1.zip › CrackDataset/groundtruth/0000000019.png]

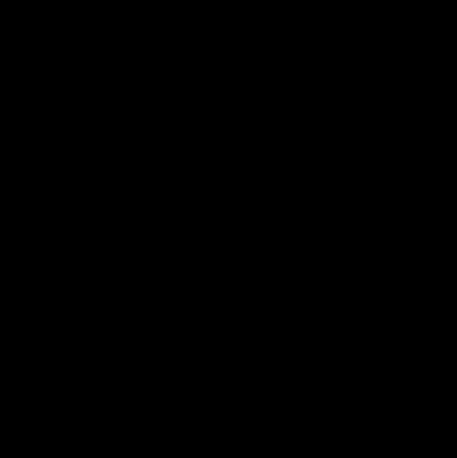

Supplement: f1 [file 6412562.f1.zip › CrackDataset/groundtruth/000000002.png]

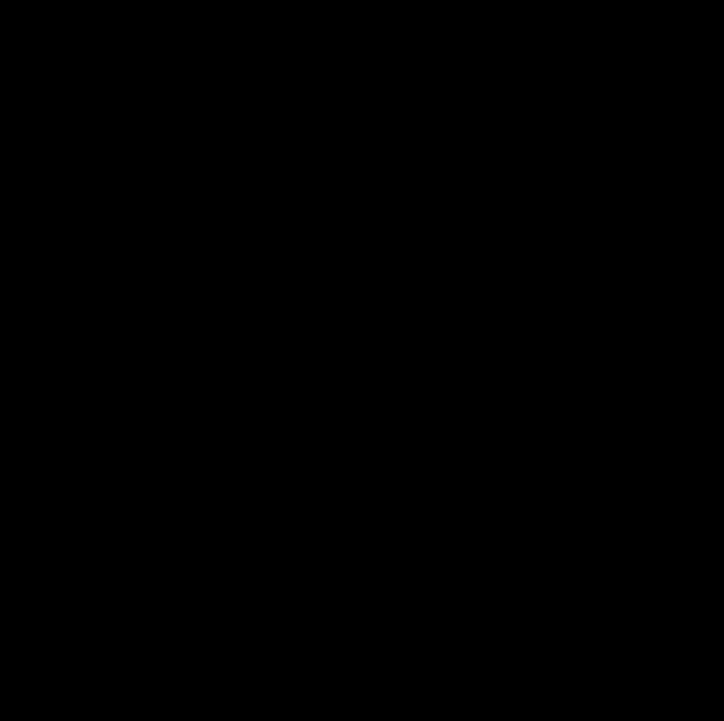

Supplement: f1 [file 6412562.f1.zip › CrackDataset/groundtruth/0000000020.png]

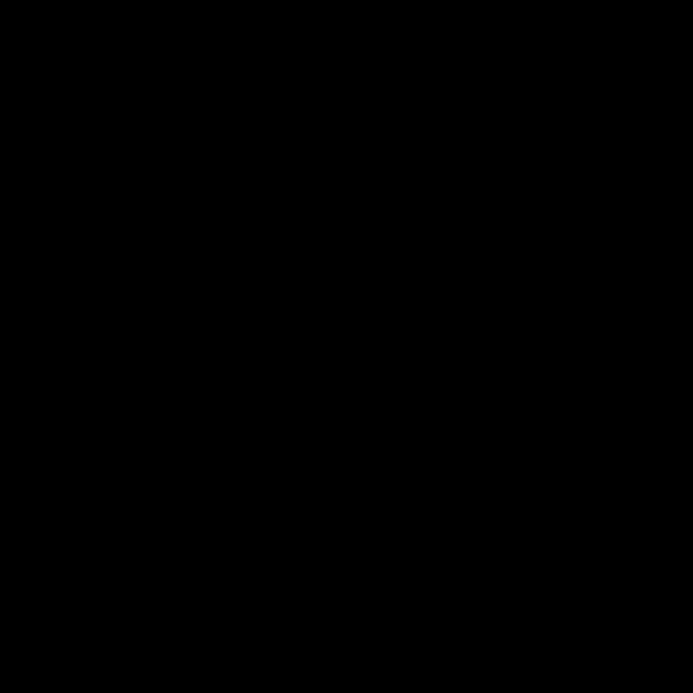

Supplement: f1 [file 6412562.f1.zip › CrackDataset/groundtruth/0000000021.png]

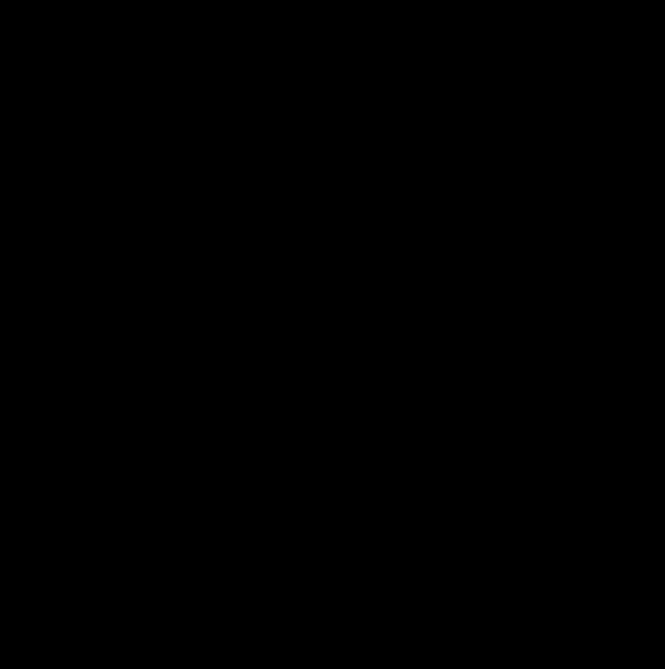

Supplement: f1 [file 6412562.f1.zip › CrackDataset/groundtruth/0000000023.png]

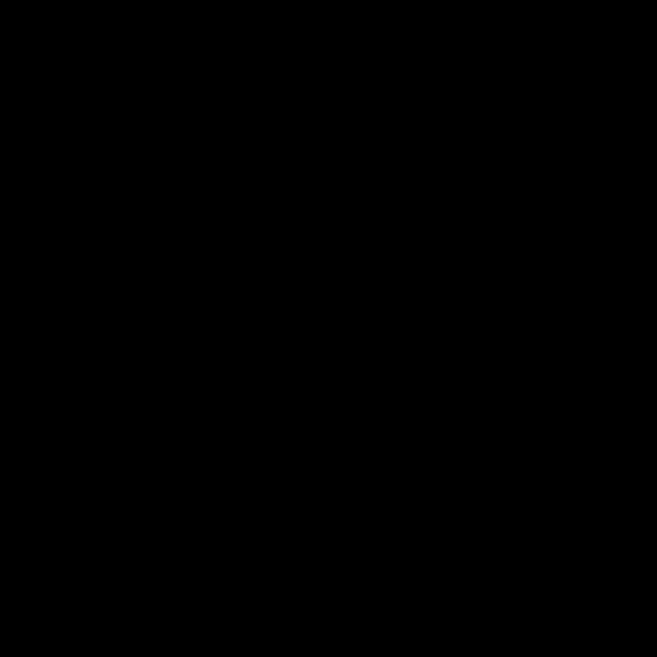

Supplement: f1 [file 6412562.f1.zip › CrackDataset/groundtruth/0000000024.png]

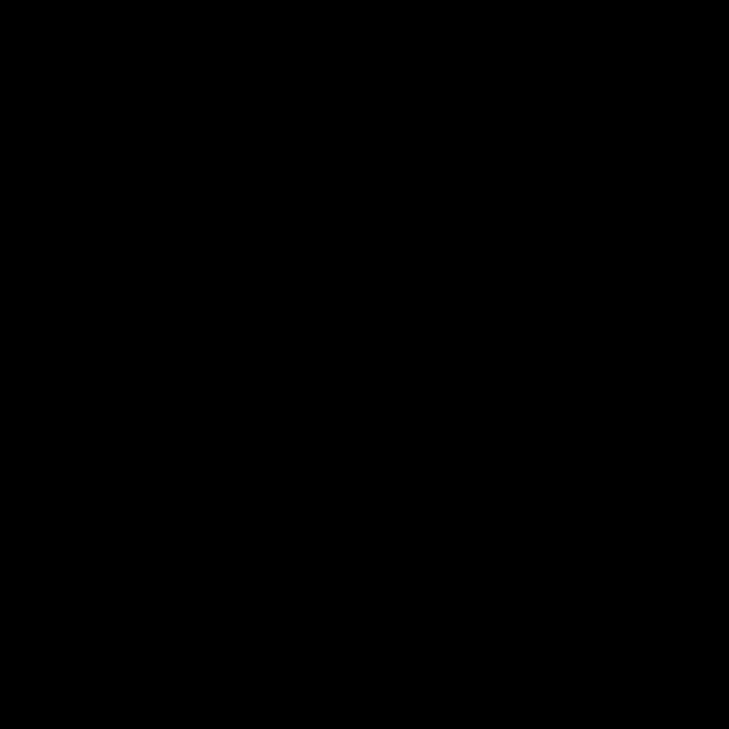

Supplement: f1 [file 6412562.f1.zip › CrackDataset/groundtruth/0000000026.png]

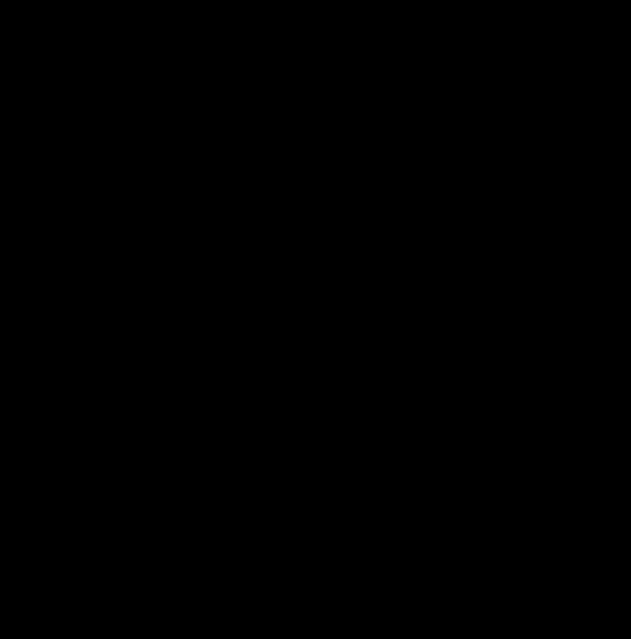

Supplement: f1 [file 6412562.f1.zip › CrackDataset/groundtruth/0000000027.png]

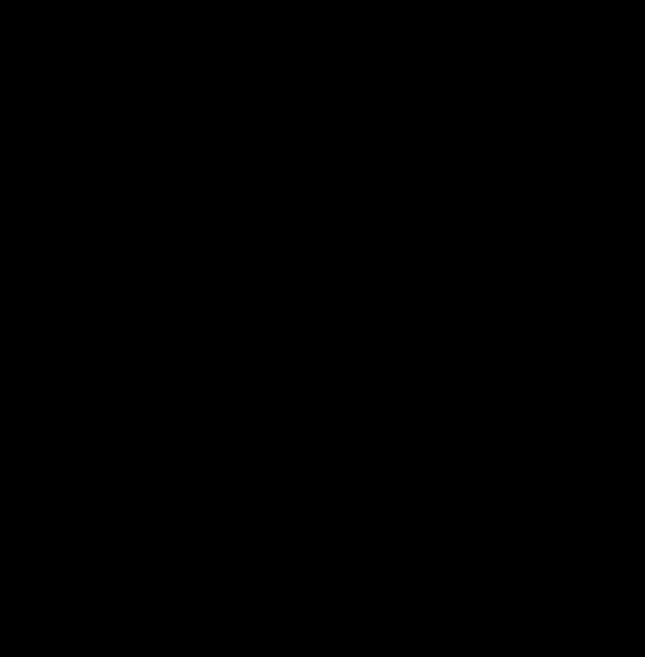

Supplement: f1 [file 6412562.f1.zip › CrackDataset/groundtruth/0000000028.png]

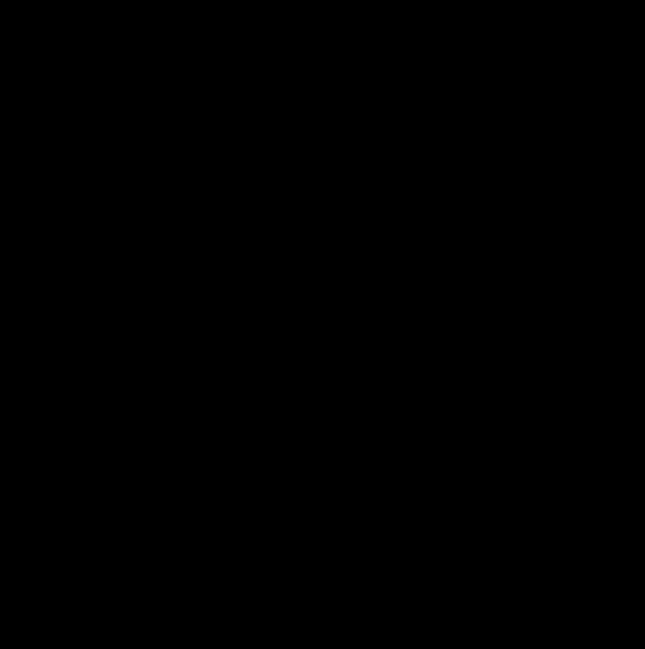

Supplement: f1 [file 6412562.f1.zip › CrackDataset/groundtruth/0000000029.png]

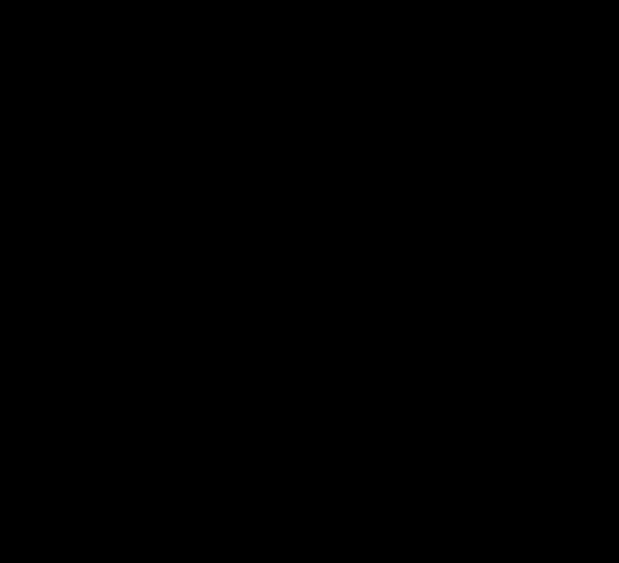

Supplement: f1 [file 6412562.f1.zip › CrackDataset/groundtruth/000000003.png]

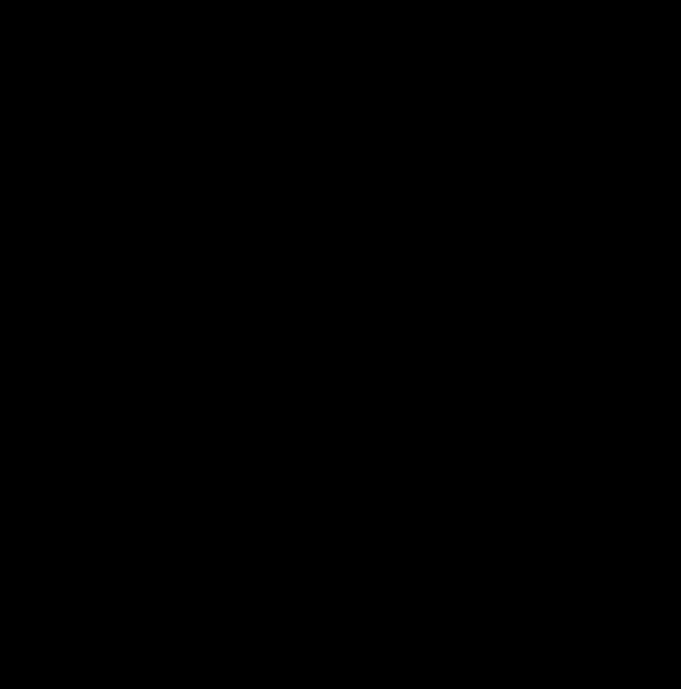

Supplement: f1 [file 6412562.f1.zip › CrackDataset/groundtruth/0000000030.png]

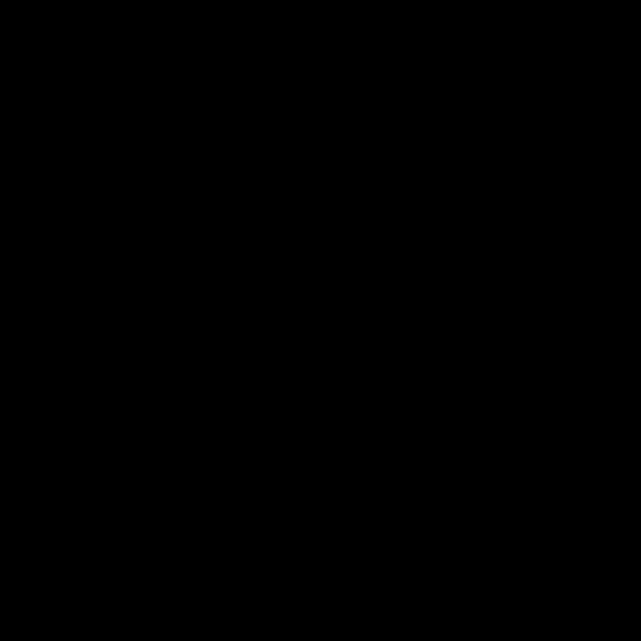

Supplement: f1 [file 6412562.f1.zip › CrackDataset/groundtruth/0000000031.png]

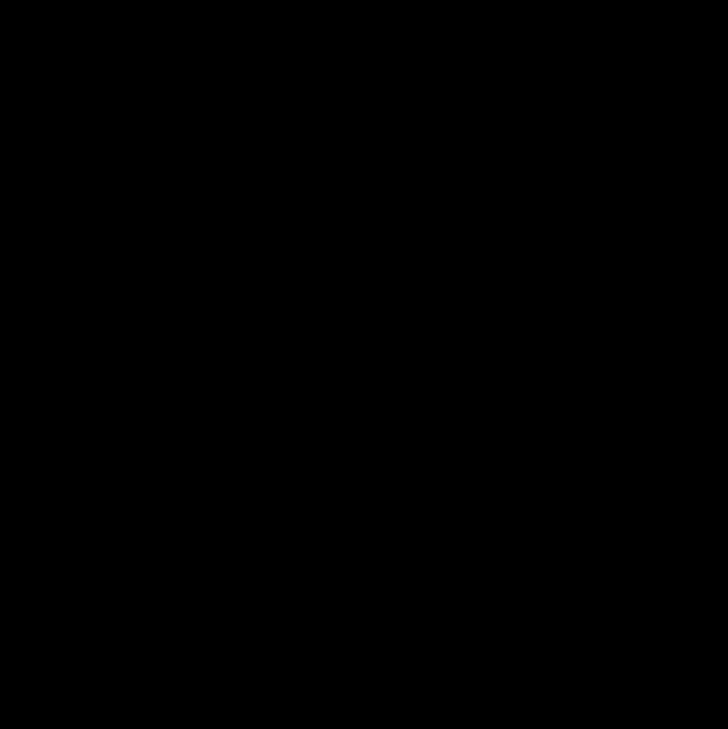

Supplement: f1 [file 6412562.f1.zip › CrackDataset/groundtruth/0000000032.png]

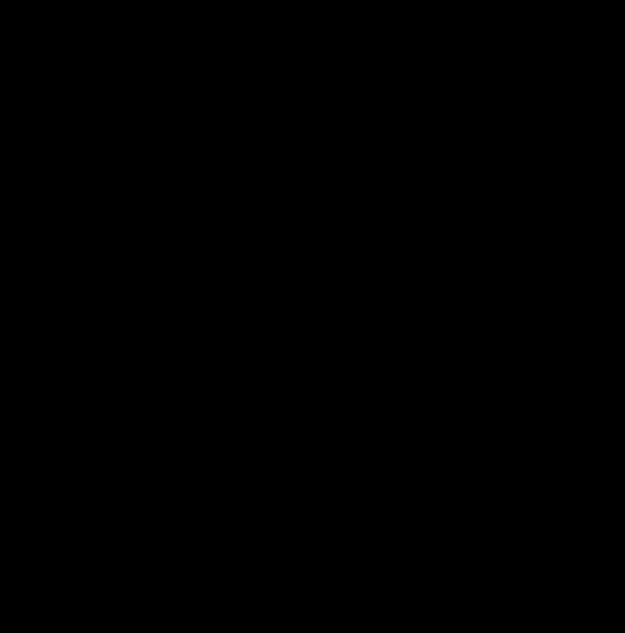

Supplement: f1 [file 6412562.f1.zip › CrackDataset/groundtruth/0000000033.png]

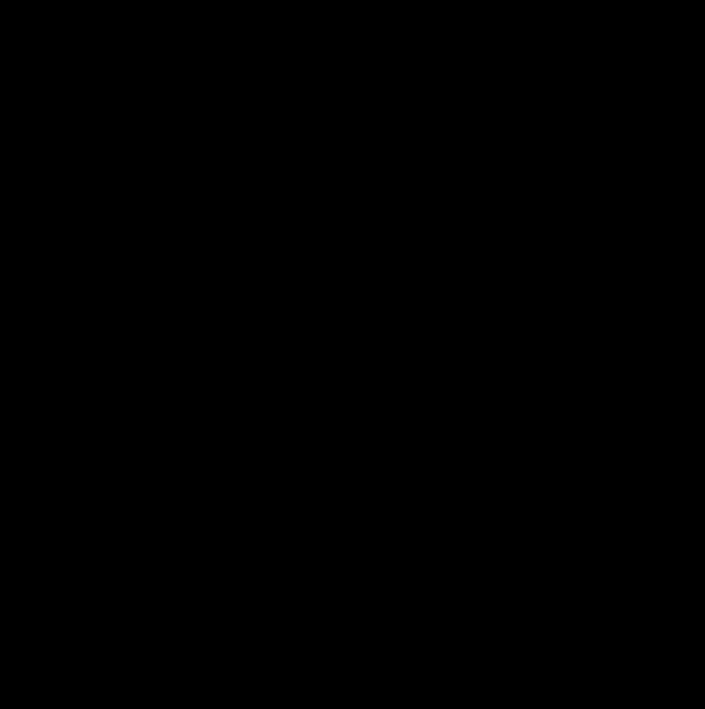

Supplement: f1 [file 6412562.f1.zip › CrackDataset/groundtruth/0000000034.png]

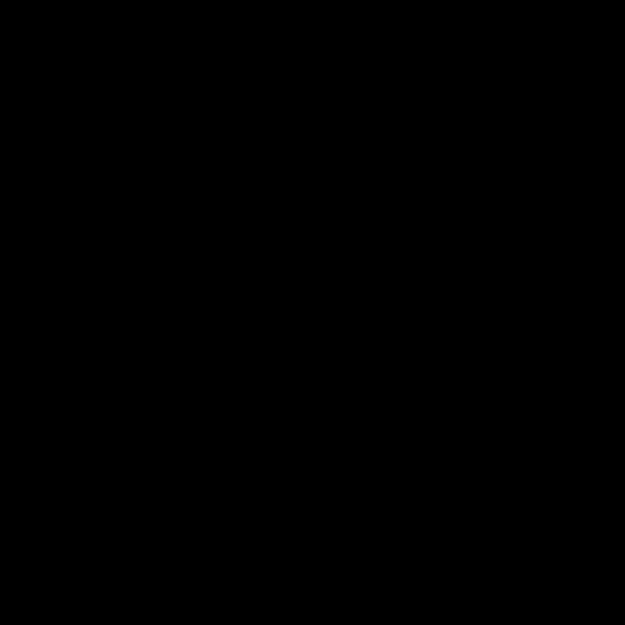

Supplement: f1 [file 6412562.f1.zip › CrackDataset/groundtruth/0000000035.png]

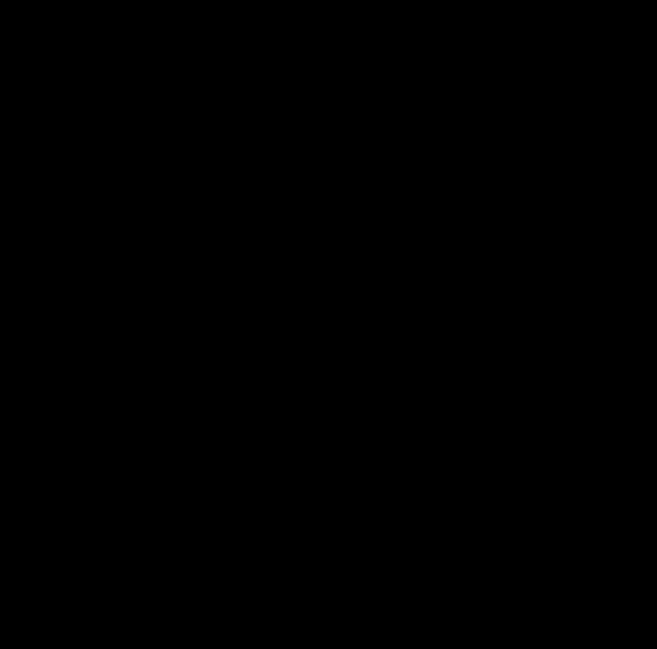

Supplement: f1 [file 6412562.f1.zip › CrackDataset/groundtruth/0000000036.png]

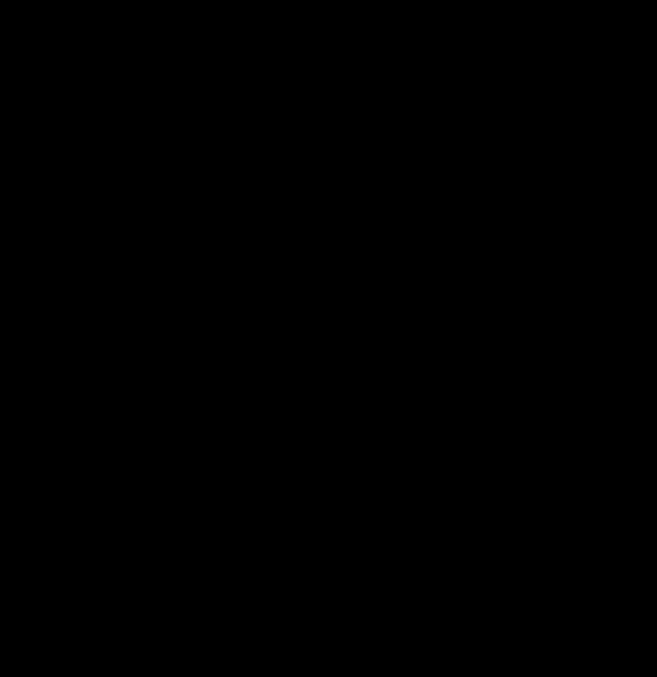

Supplement: f1 [file 6412562.f1.zip › CrackDataset/groundtruth/0000000039.png]

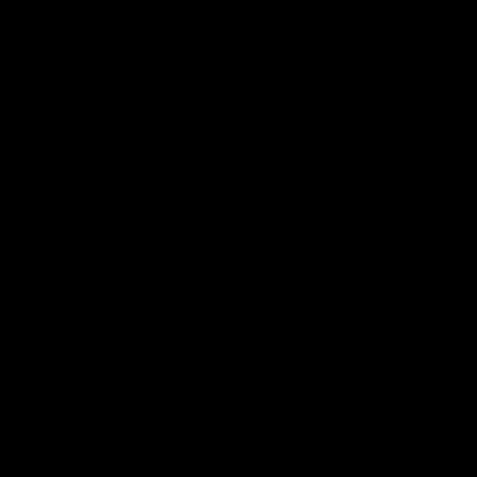

Supplement: f1 [file 6412562.f1.zip › CrackDataset/groundtruth/000000004.png]

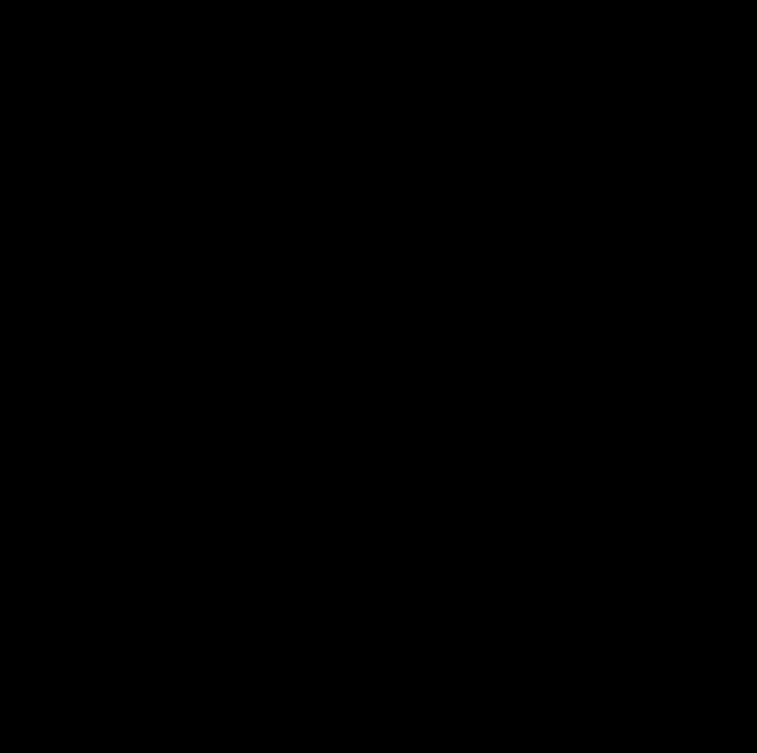

Supplement: f1 [file 6412562.f1.zip › CrackDataset/groundtruth/0000000040.png]

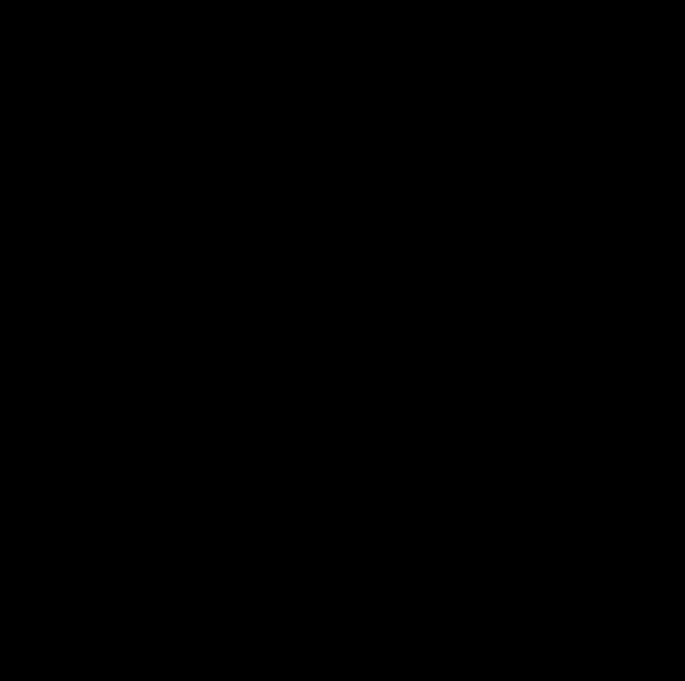

Supplement: f1 [file 6412562.f1.zip › CrackDataset/groundtruth/0000000041.png]

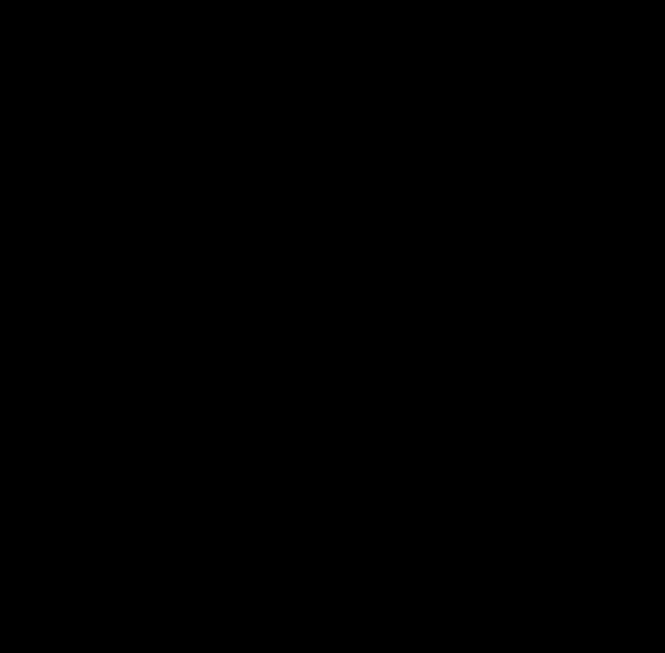

Supplement: f1 [file 6412562.f1.zip › CrackDataset/groundtruth/0000000042.png]

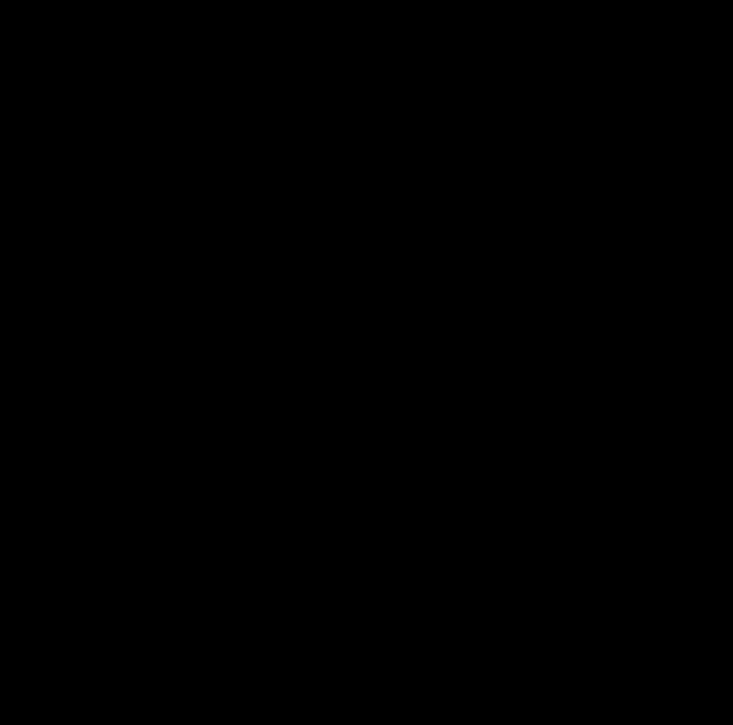

Supplement: f1 [file 6412562.f1.zip › CrackDataset/groundtruth/0000000043.png]

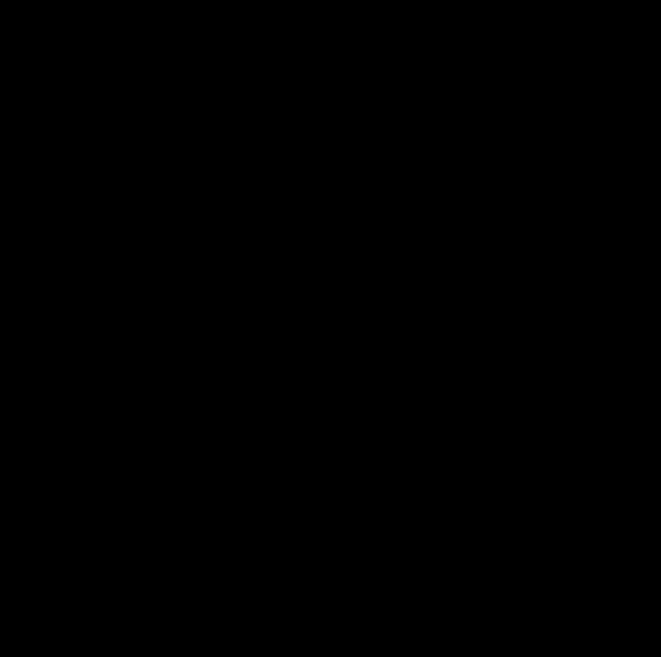

Supplement: f1 [file 6412562.f1.zip › CrackDataset/groundtruth/0000000044.png]

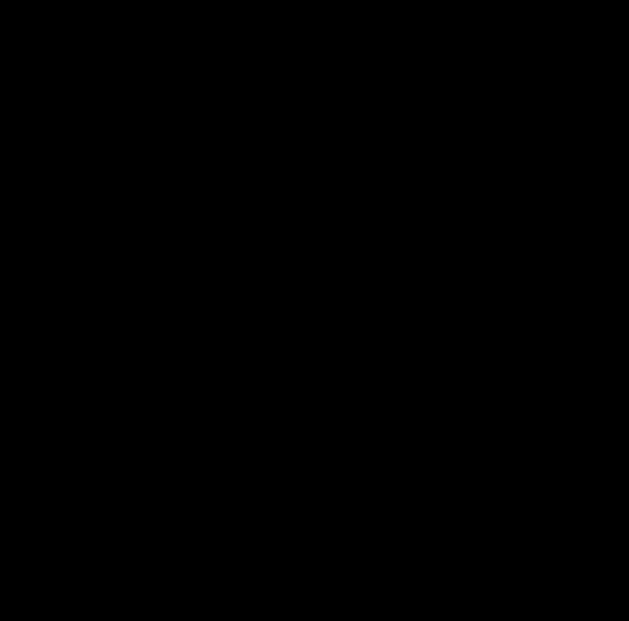

Supplement: f1 [file 6412562.f1.zip › CrackDataset/groundtruth/0000000045.png]

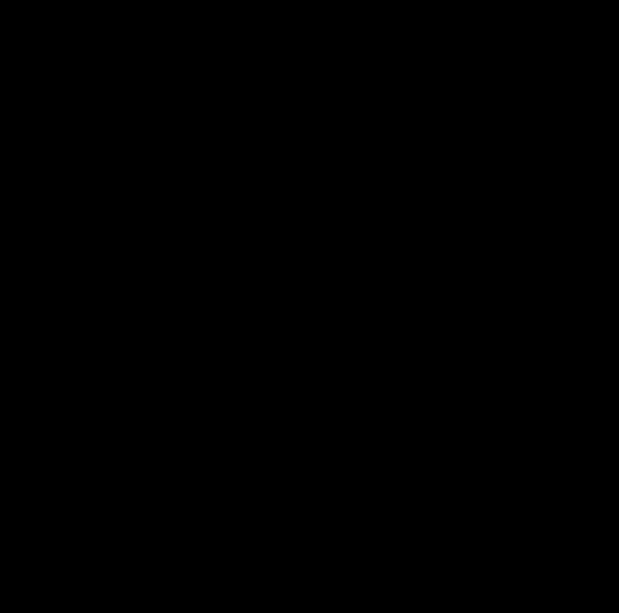

Supplement: f1 [file 6412562.f1.zip › CrackDataset/groundtruth/0000000046.png]

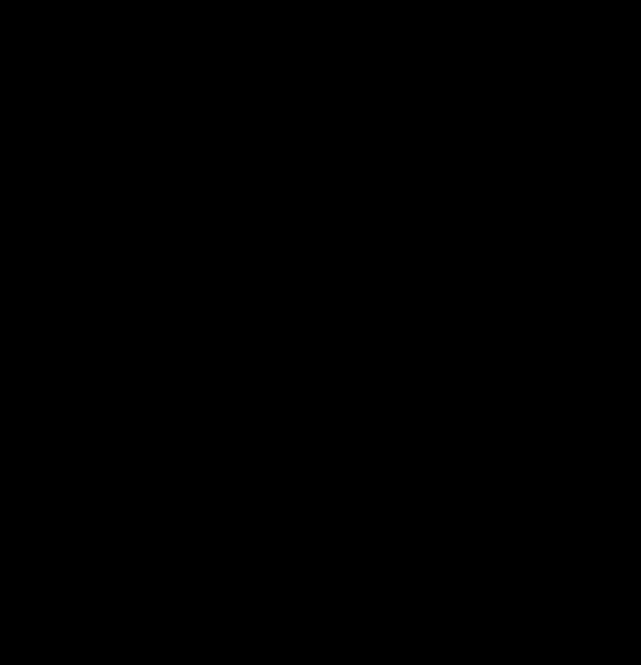

Supplement: f1 [file 6412562.f1.zip › CrackDataset/groundtruth/0000000047.png]

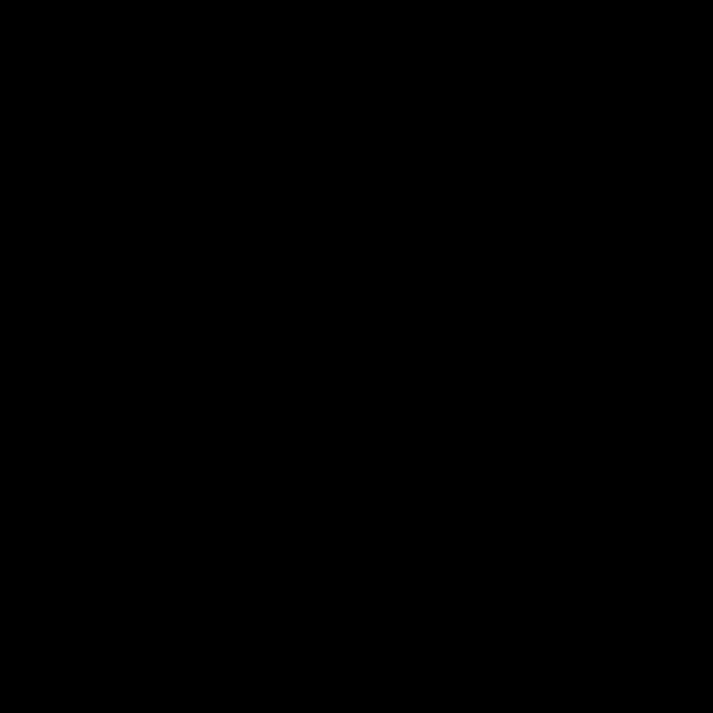

Supplement: f1 [file 6412562.f1.zip › CrackDataset/groundtruth/0000000048.png]

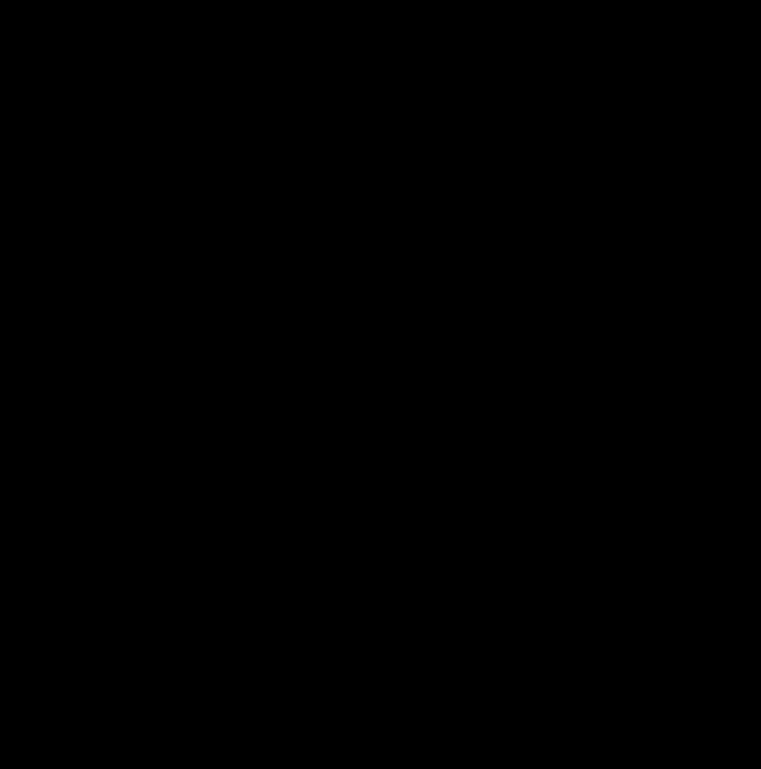

Supplement: f1 [file 6412562.f1.zip › CrackDataset/groundtruth/0000000049.png]

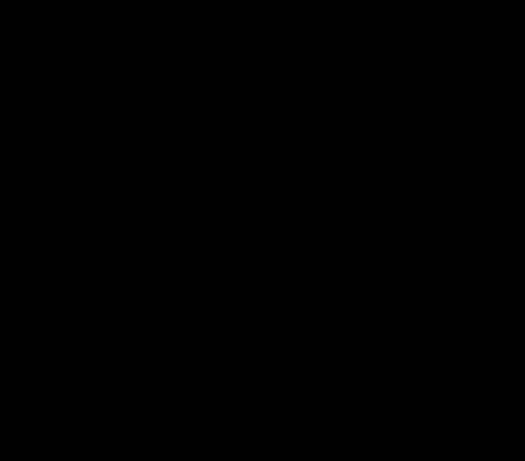

Supplement: f1 [file 6412562.f1.zip › CrackDataset/groundtruth/000000005.png]

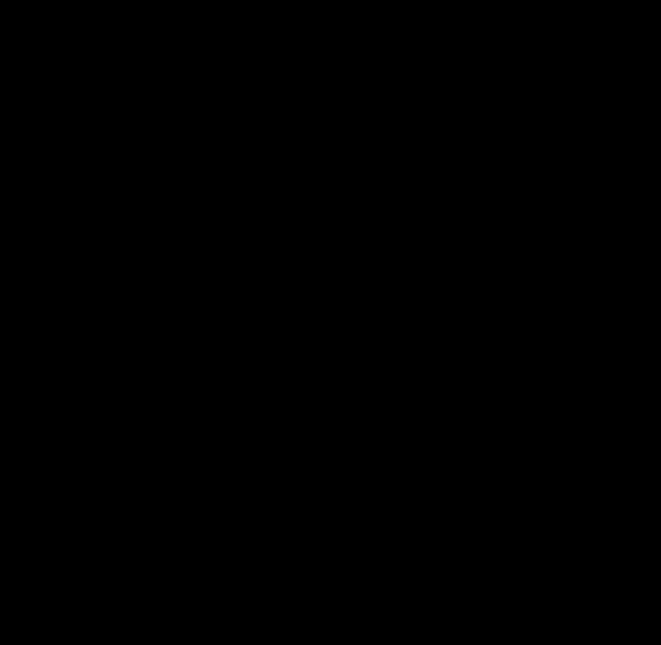

Supplement: f1 [file 6412562.f1.zip › CrackDataset/groundtruth/0000000050.png]

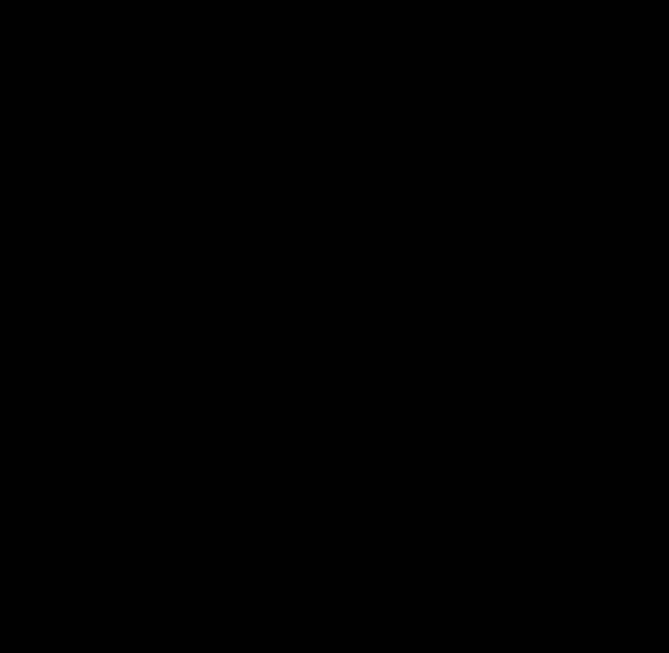

Supplement: f1 [file 6412562.f1.zip › CrackDataset/groundtruth/0000000051.png]

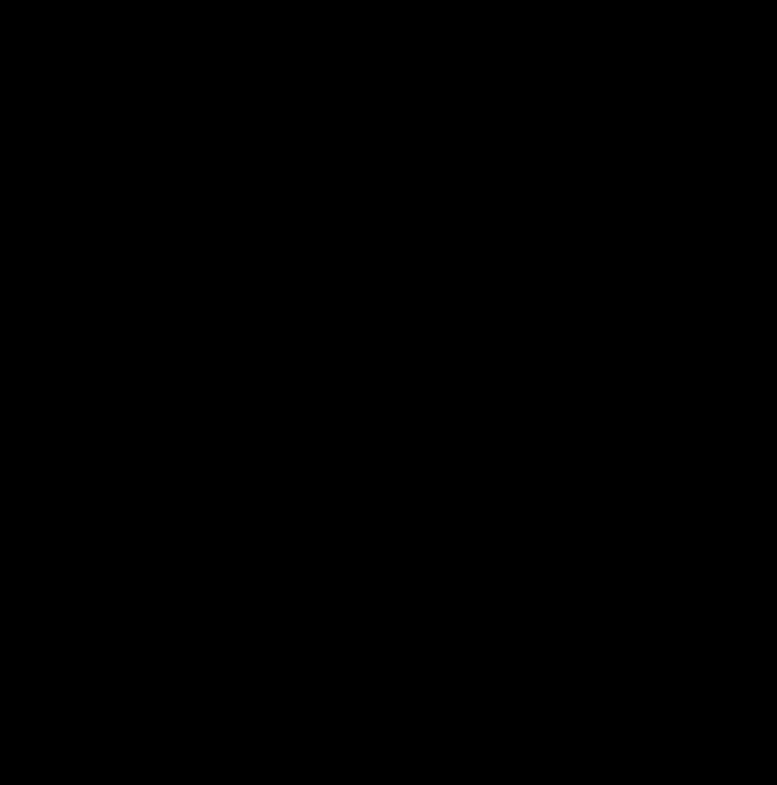

Supplement: f1 [file 6412562.f1.zip › CrackDataset/groundtruth/0000000052.png]

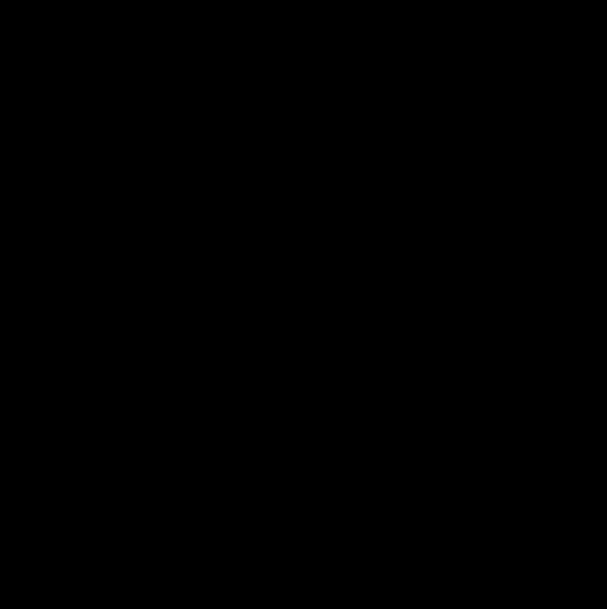

Supplement: f1 [file 6412562.f1.zip › CrackDataset/groundtruth/0000000053.png]

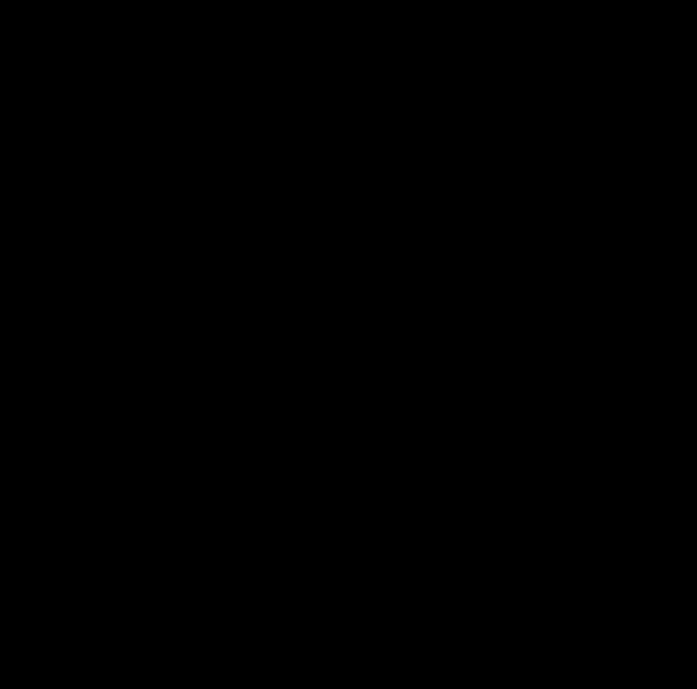

Supplement: f1 [file 6412562.f1.zip › CrackDataset/groundtruth/0000000054.png]

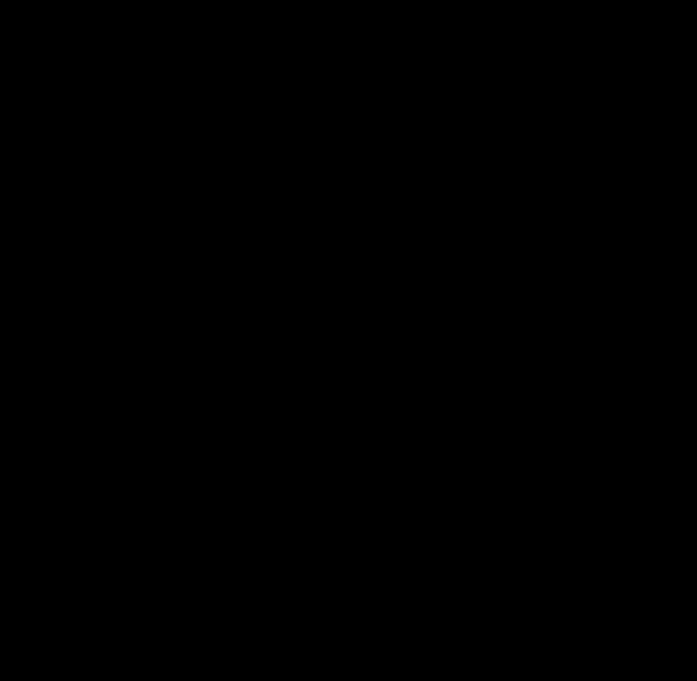

Supplement: f1 [file 6412562.f1.zip › CrackDataset/groundtruth/0000000055.png]

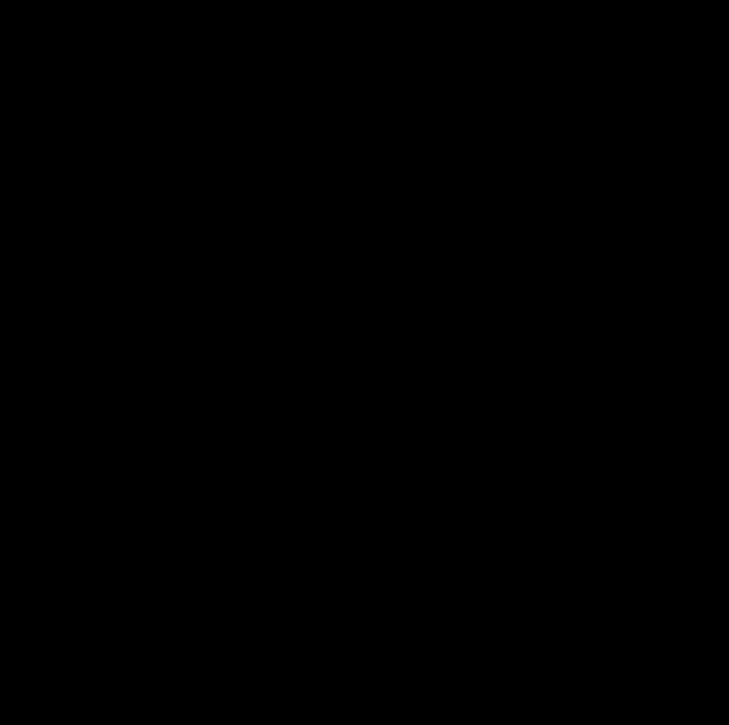

Supplement: f1 [file 6412562.f1.zip › CrackDataset/groundtruth/0000000056.png]

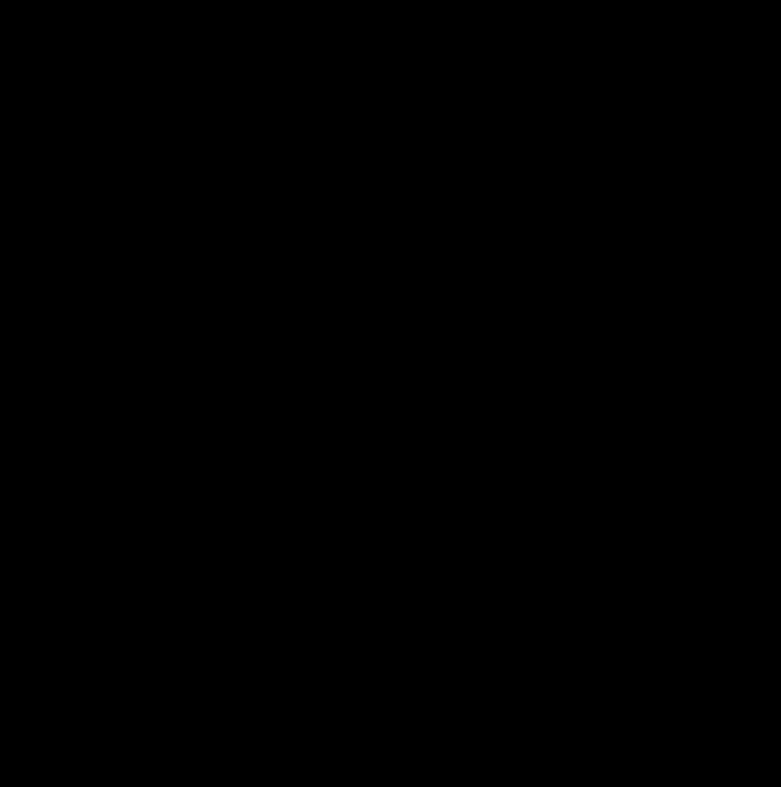

Supplement: f1 [file 6412562.f1.zip › CrackDataset/groundtruth/0000000057.png]

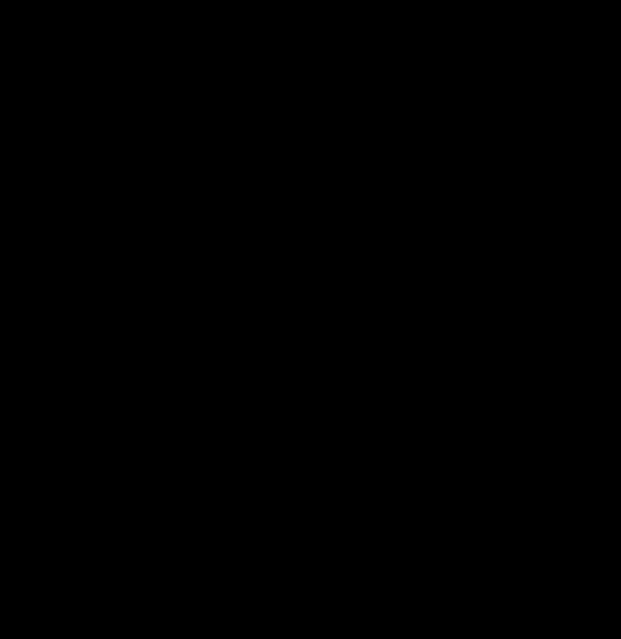

Supplement: f1 [file 6412562.f1.zip › CrackDataset/groundtruth/0000000058.png]

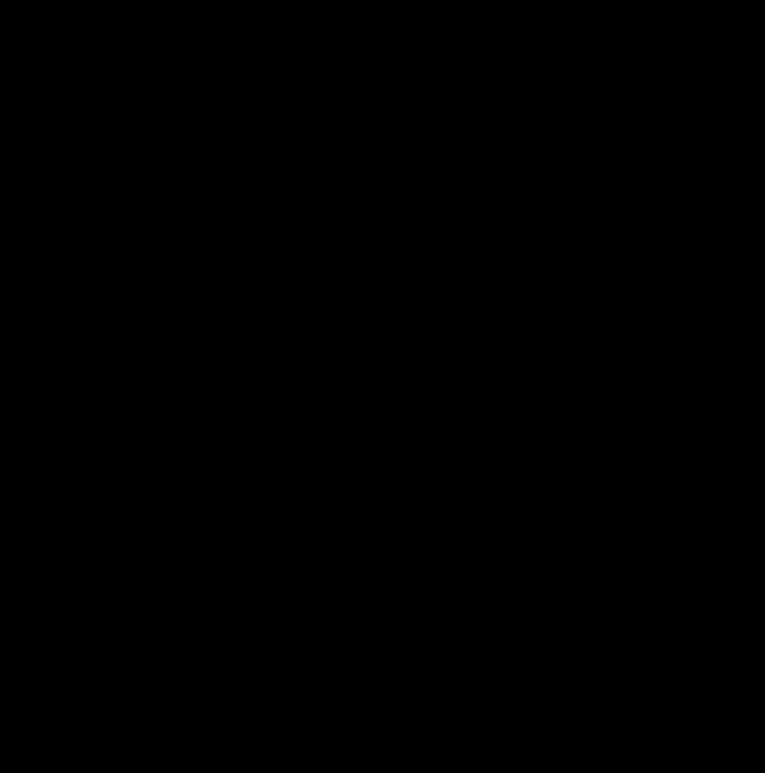

Supplement: f1 [file 6412562.f1.zip › CrackDataset/groundtruth/0000000059.png]

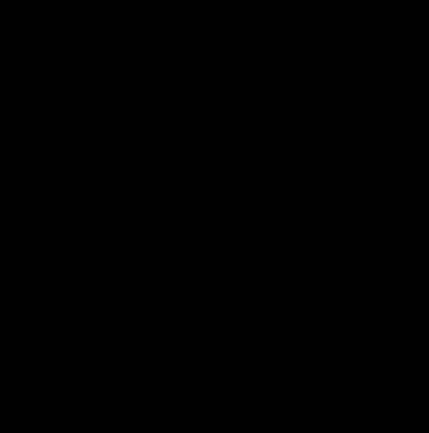

Supplement: f1 [file 6412562.f1.zip › CrackDataset/groundtruth/000000006.png]

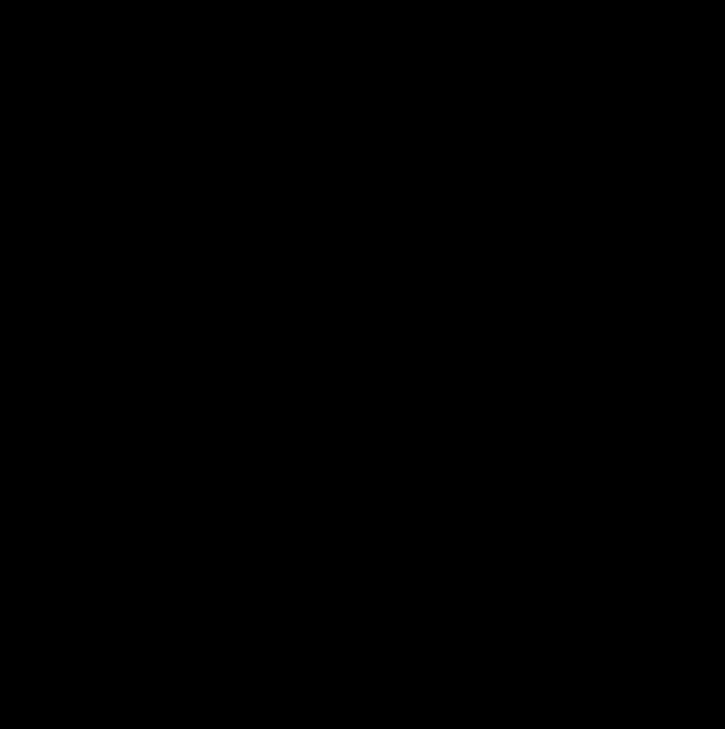

Supplement: f1 [file 6412562.f1.zip › CrackDataset/groundtruth/0000000060.png]

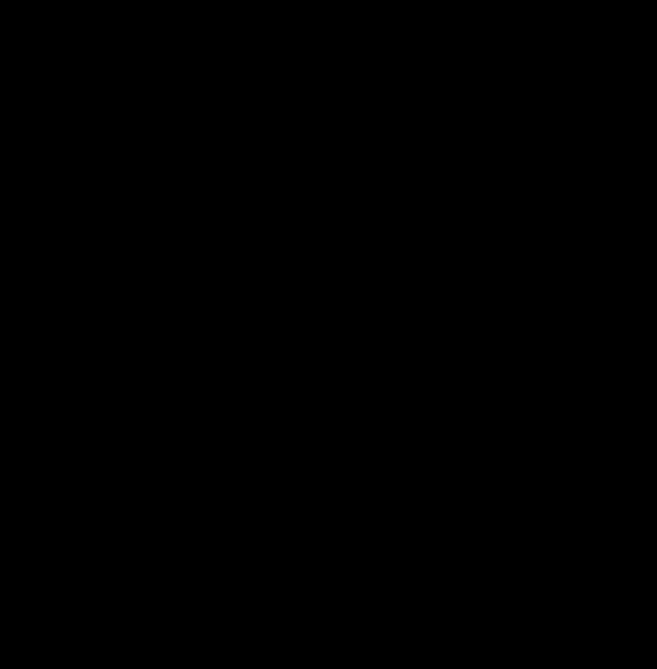

Supplement: f1 [file 6412562.f1.zip › CrackDataset/groundtruth/0000000062.png]

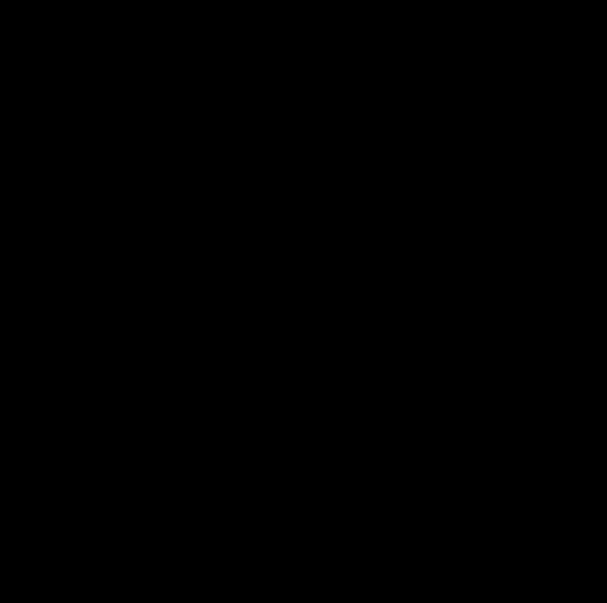

Supplement: f1 [file 6412562.f1.zip › CrackDataset/groundtruth/0000000063.png]

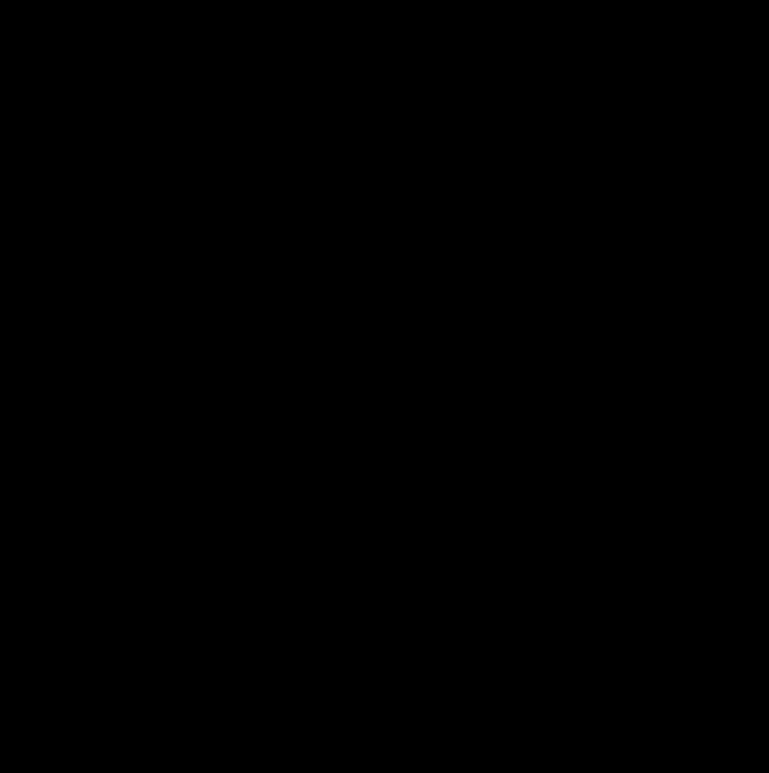

Supplement: f1 [file 6412562.f1.zip › CrackDataset/groundtruth/0000000064.png]

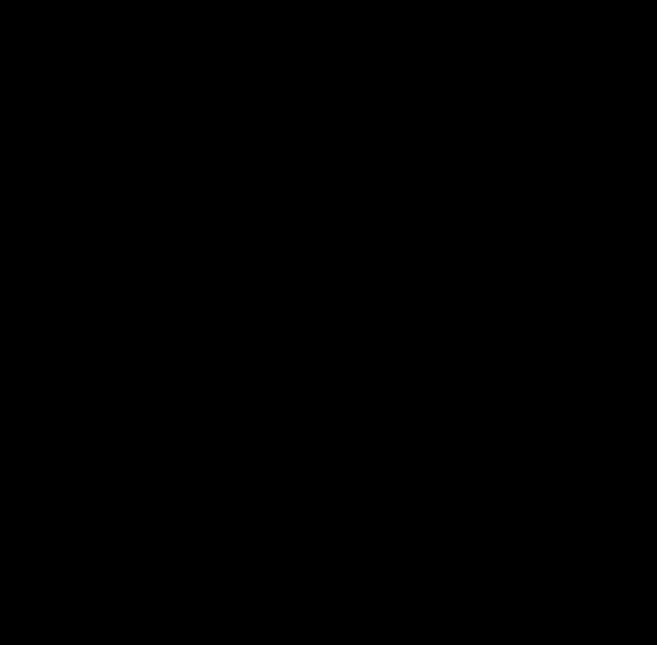

Supplement: f1 [file 6412562.f1.zip › CrackDataset/groundtruth/0000000065.png]

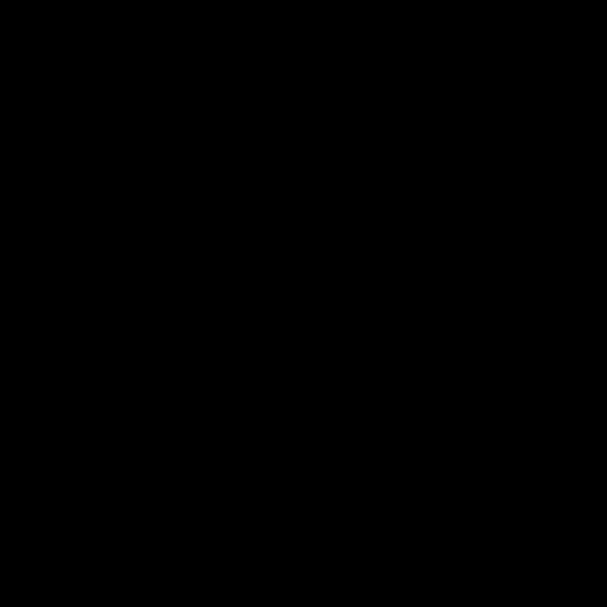

Supplement: f1 [file 6412562.f1.zip › CrackDataset/groundtruth/0000000066.png]

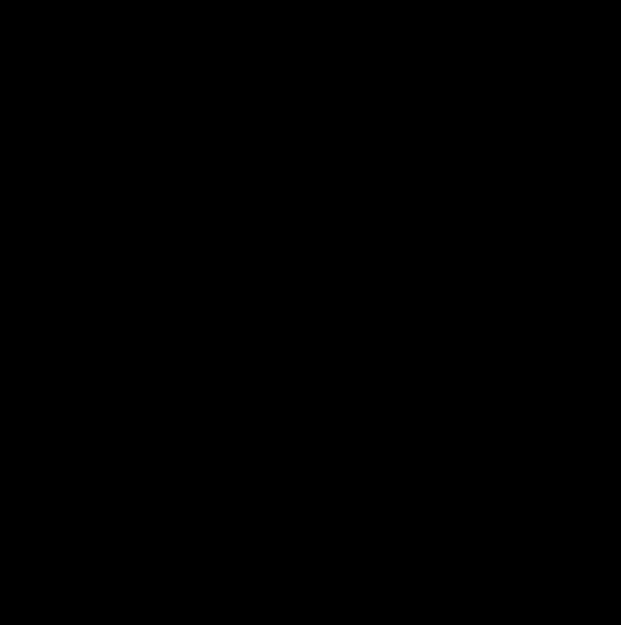

Supplement: f1 [file 6412562.f1.zip › CrackDataset/groundtruth/0000000067.png]

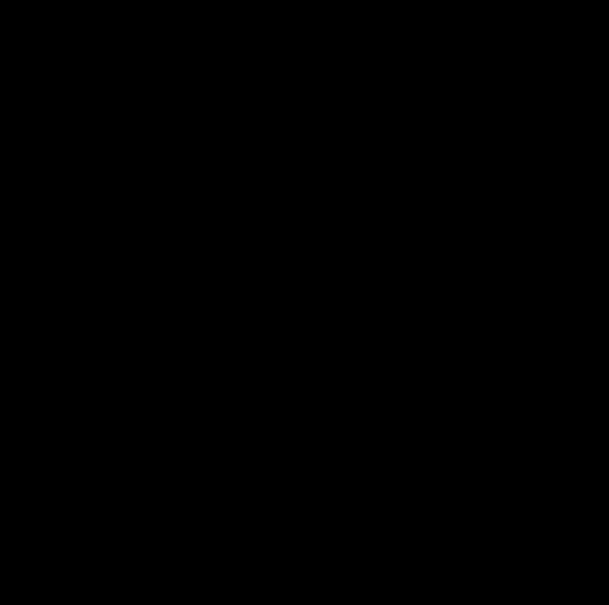

Supplement: f1 [file 6412562.f1.zip › CrackDataset/groundtruth/0000000068.png]

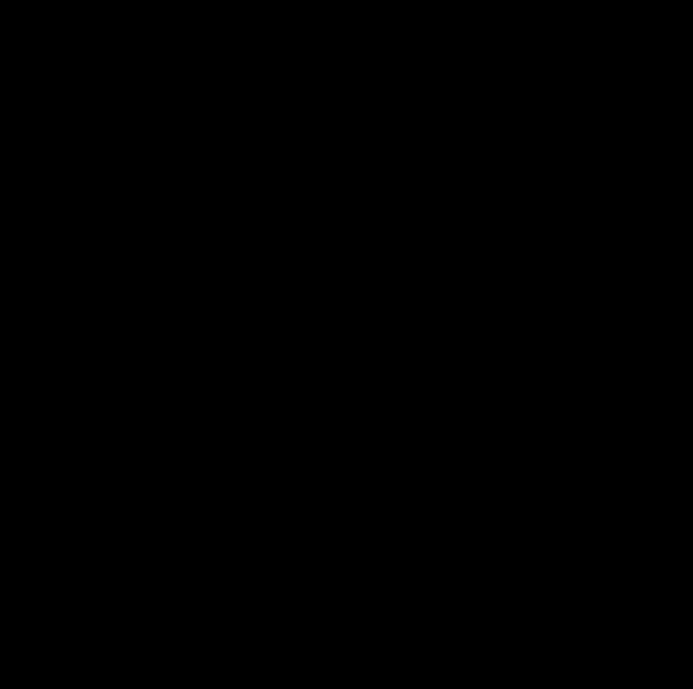

Supplement: f1 [file 6412562.f1.zip › CrackDataset/groundtruth/0000000069.png]

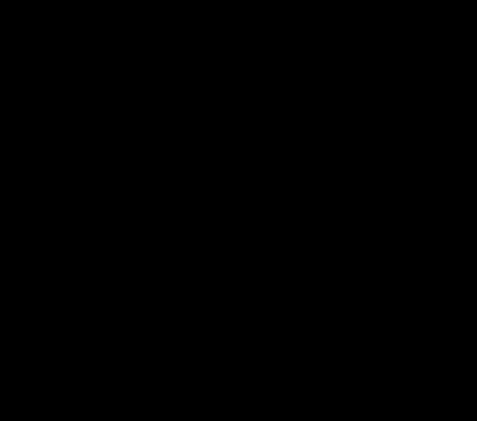

Supplement: f1 [file 6412562.f1.zip › CrackDataset/groundtruth/000000007.png]

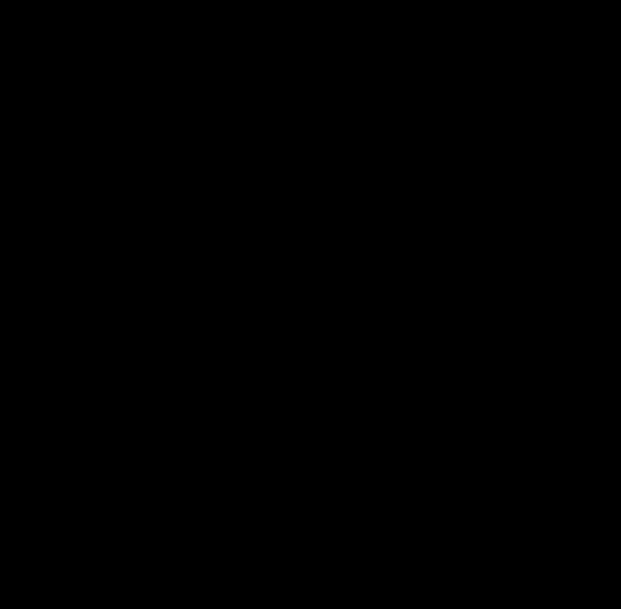

Supplement: f1 [file 6412562.f1.zip › CrackDataset/groundtruth/0000000070.png]

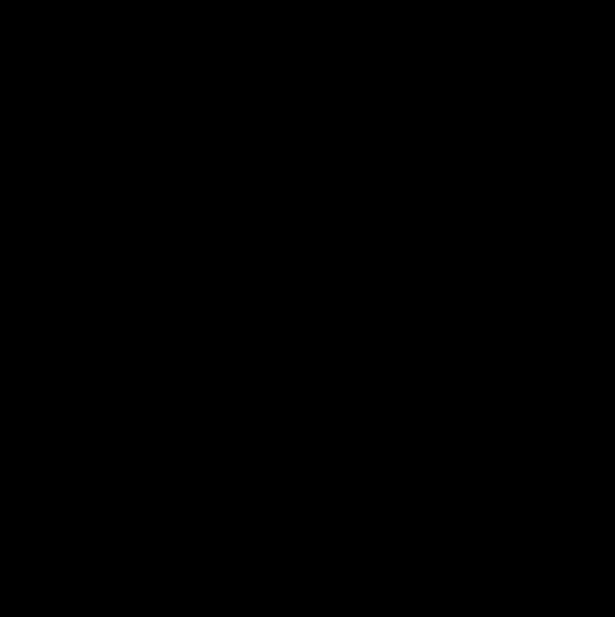

Supplement: f1 [file 6412562.f1.zip › CrackDataset/groundtruth/0000000071.png]

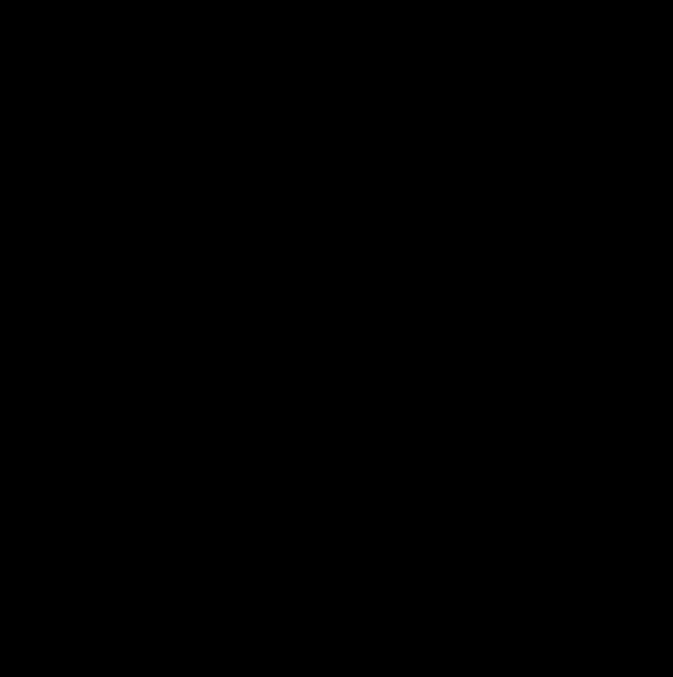

Supplement: f1 [file 6412562.f1.zip › CrackDataset/groundtruth/0000000072.png]

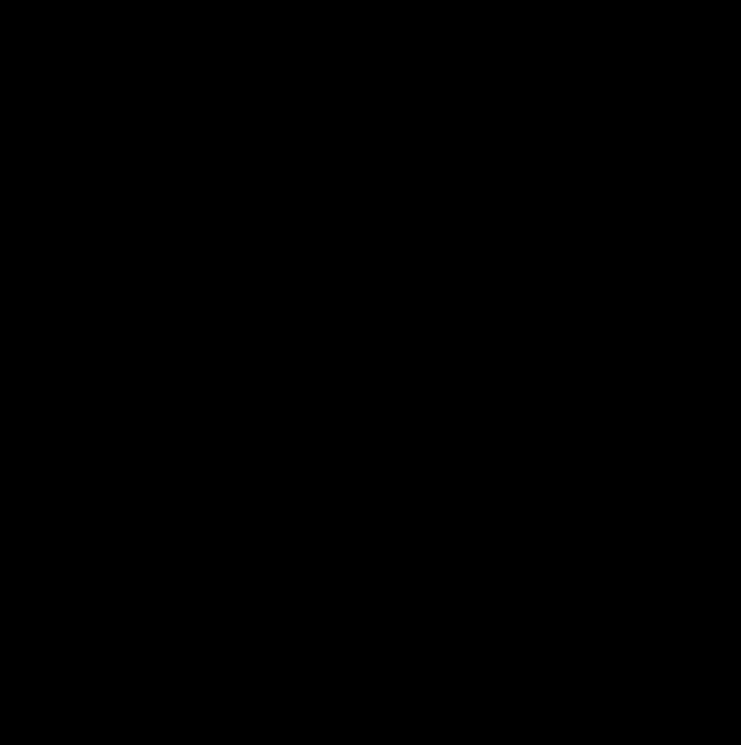

Supplement: f1 [file 6412562.f1.zip › CrackDataset/groundtruth/0000000073.png]

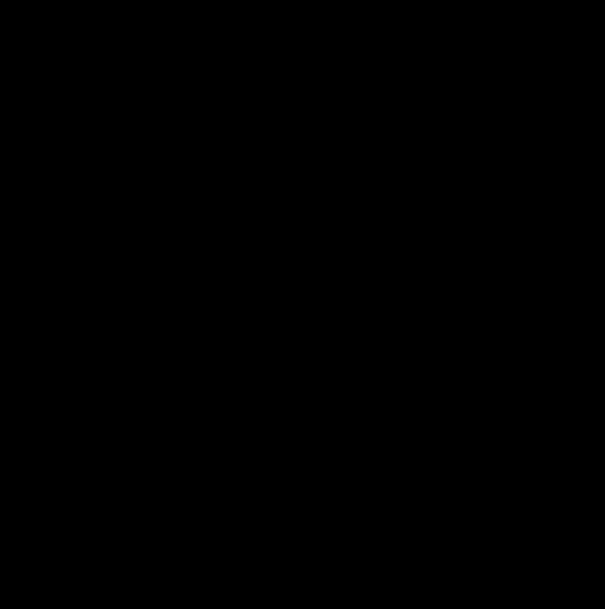

Supplement: f1 [file 6412562.f1.zip › CrackDataset/groundtruth/0000000074.png]

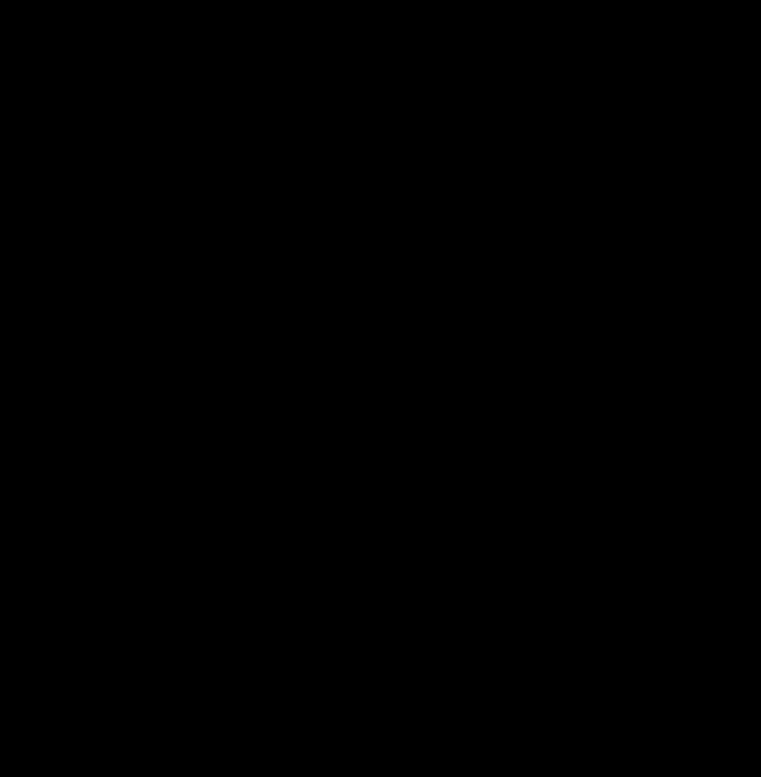

Supplement: f1 [file 6412562.f1.zip › CrackDataset/groundtruth/0000000075.png]

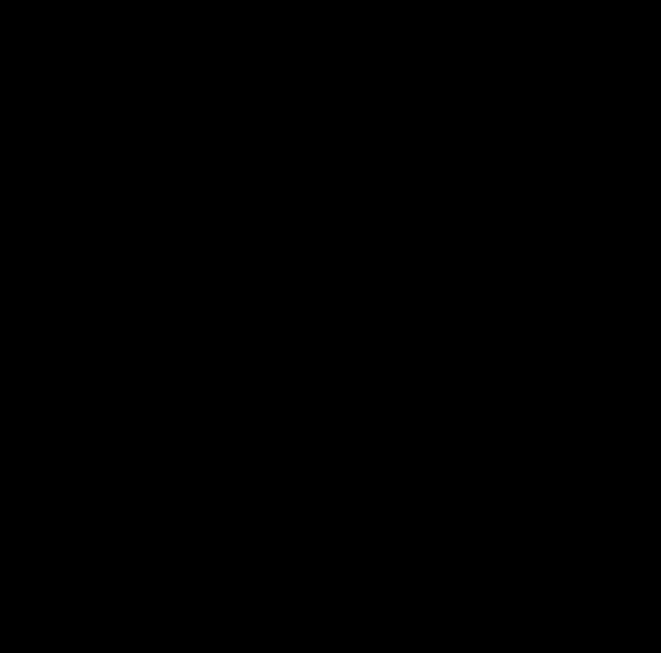

Supplement: f1 [file 6412562.f1.zip › CrackDataset/groundtruth/0000000076.png]

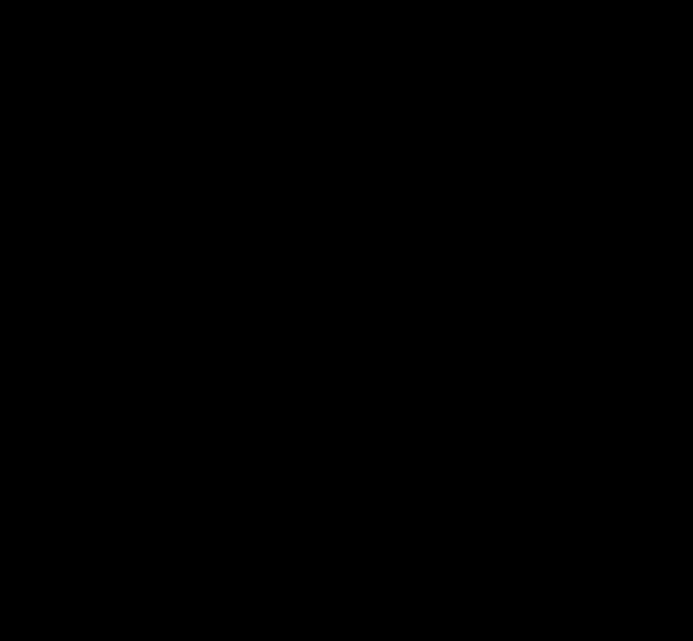

Supplement: f1 [file 6412562.f1.zip › CrackDataset/groundtruth/000000008.png]

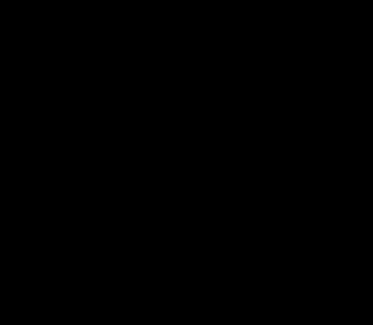

Supplement: f1 [file 6412562.f1.zip › CrackDataset/groundtruth/000000009.png]

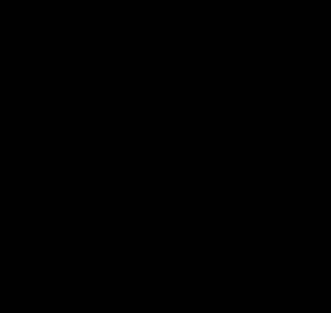

Supplement: f1 [file 6412562.f1.zip › CrackDataset/groundtruth/000000010.png]

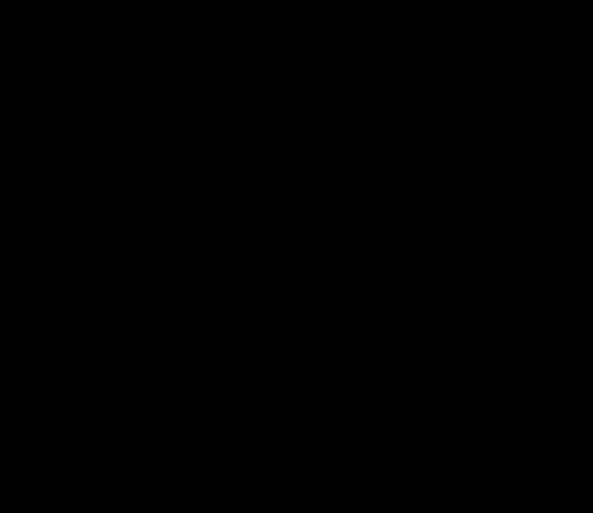

Supplement: f1 [file 6412562.f1.zip › CrackDataset/groundtruth/000000011.png]

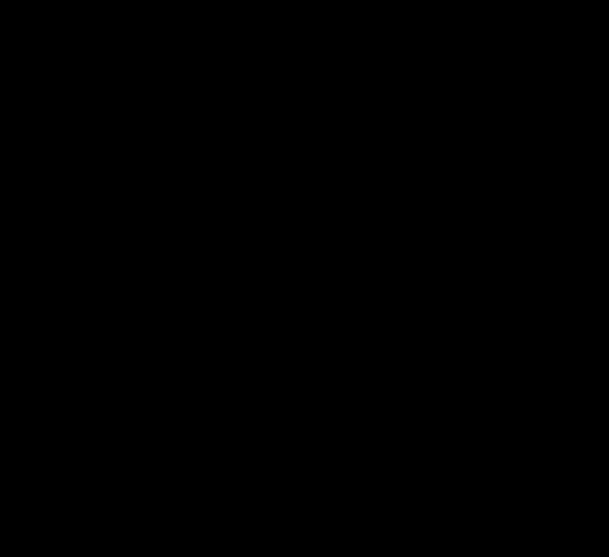

Supplement: f1 [file 6412562.f1.zip › CrackDataset/groundtruth/000000012.png]

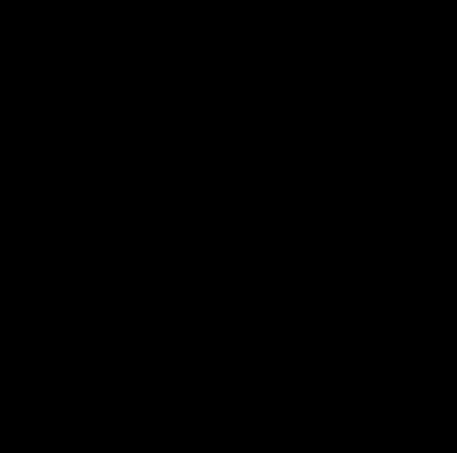

Supplement: f1 [file 6412562.f1.zip › CrackDataset/groundtruth/000000013.png]

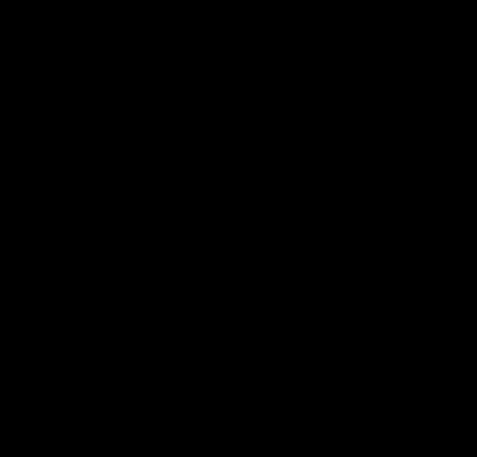

Supplement: f1 [file 6412562.f1.zip › CrackDataset/groundtruth/000000014.png]

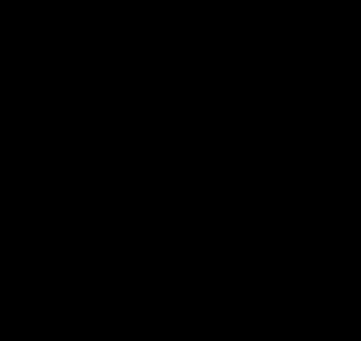

Supplement: f1 [file 6412562.f1.zip › CrackDataset/groundtruth/000000016.png]

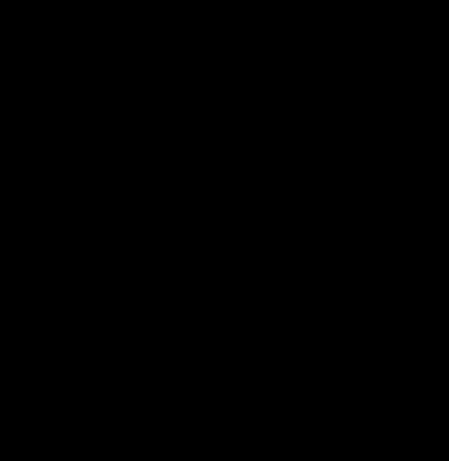

Supplement: f1 [file 6412562.f1.zip › CrackDataset/groundtruth/000000017.png]

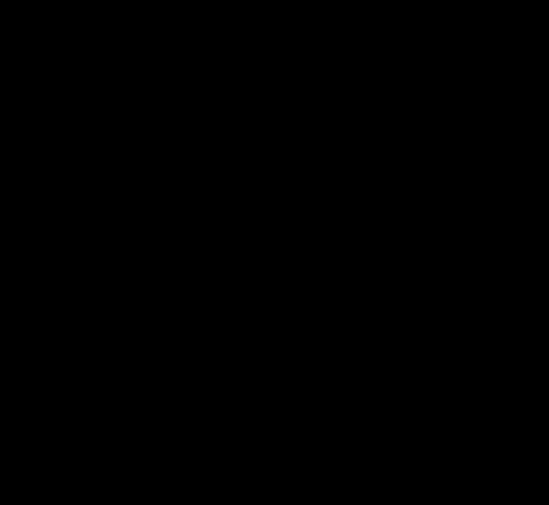

Supplement: f1 [file 6412562.f1.zip › CrackDataset/groundtruth/000000018.png]

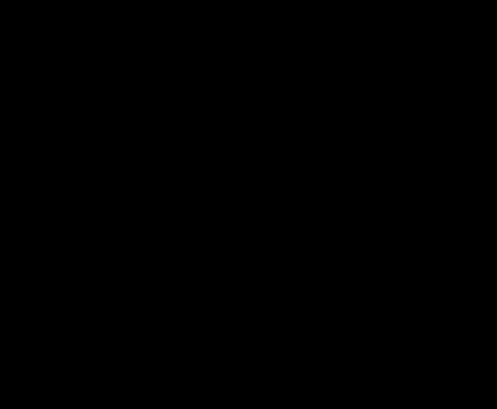

Supplement: f1 [file 6412562.f1.zip › CrackDataset/groundtruth/000000019.png]

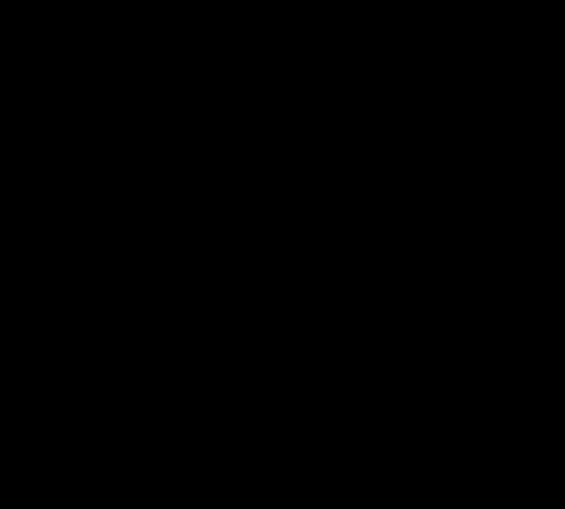

Supplement: f1 [file 6412562.f1.zip › CrackDataset/groundtruth/000000020.png]

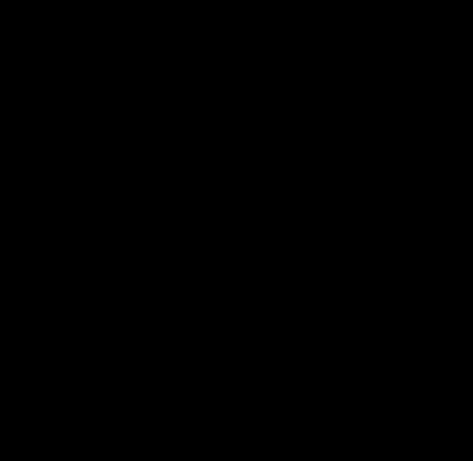

Supplement: f1 [file 6412562.f1.zip › CrackDataset/groundtruth/000000021.png]

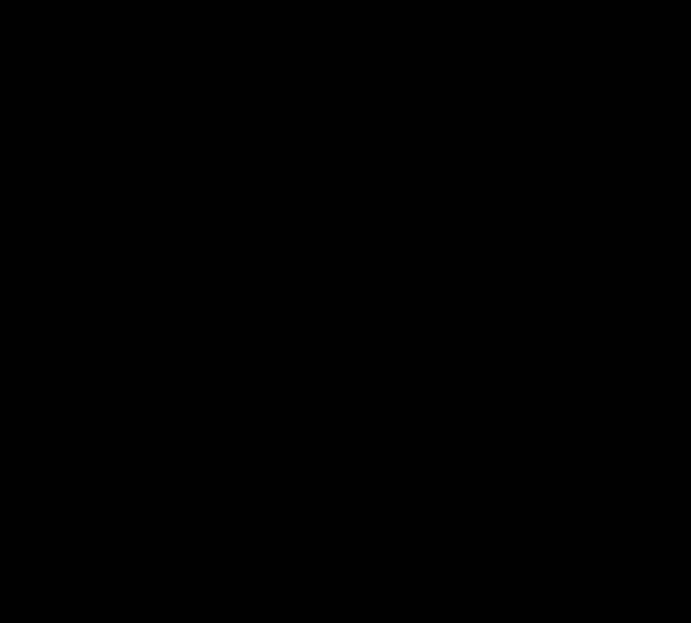

Supplement: f1 [file 6412562.f1.zip › CrackDataset/groundtruth/000000022.png]

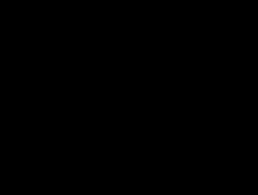

Supplement: f1 [file 6412562.f1.zip › CrackDataset/groundtruth/000000023.png]

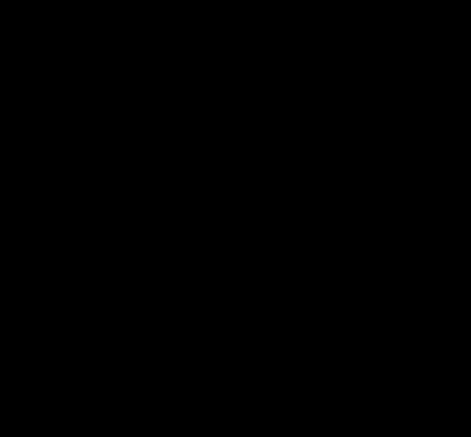

Supplement: f1 [file 6412562.f1.zip › CrackDataset/groundtruth/000000024.png]

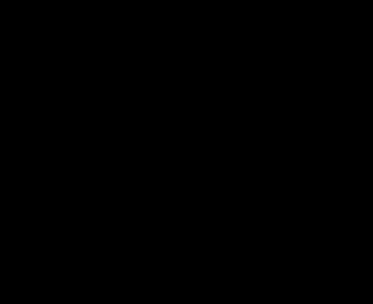

Supplement: f1 [file 6412562.f1.zip › CrackDataset/groundtruth/000000025.png]

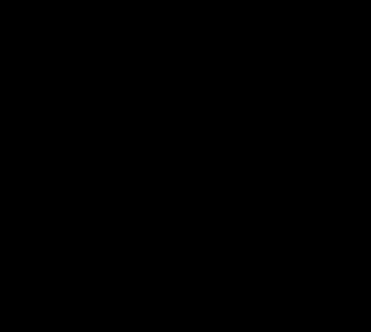

Supplement: f1 [file 6412562.f1.zip › CrackDataset/groundtruth/000000026.png]

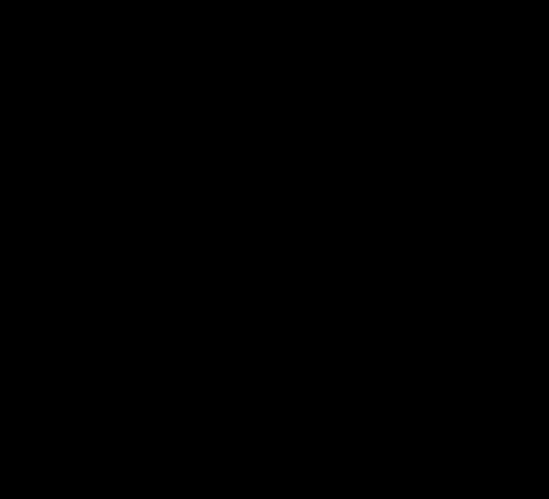

Supplement: f1 [file 6412562.f1.zip › CrackDataset/groundtruth/000000027.png]

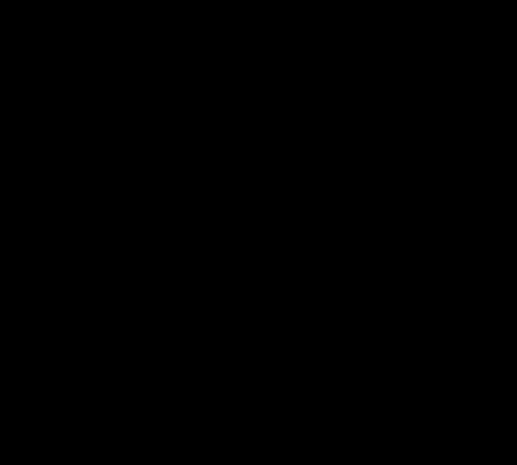

Supplement: f1 [file 6412562.f1.zip › CrackDataset/groundtruth/000000028.png]

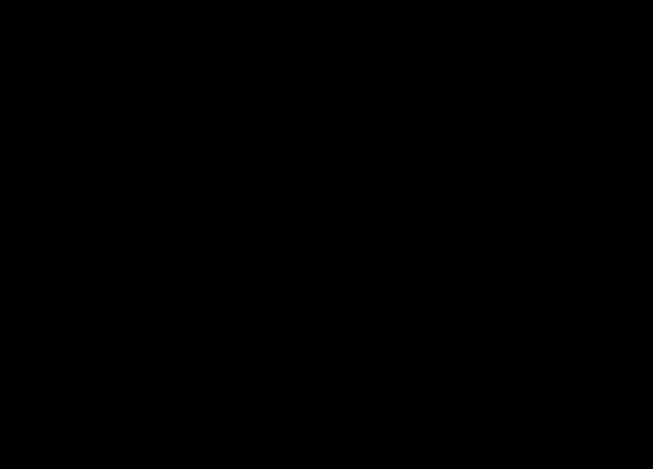

Supplement: f1 [file 6412562.f1.zip › CrackDataset/groundtruth/000000029.png]

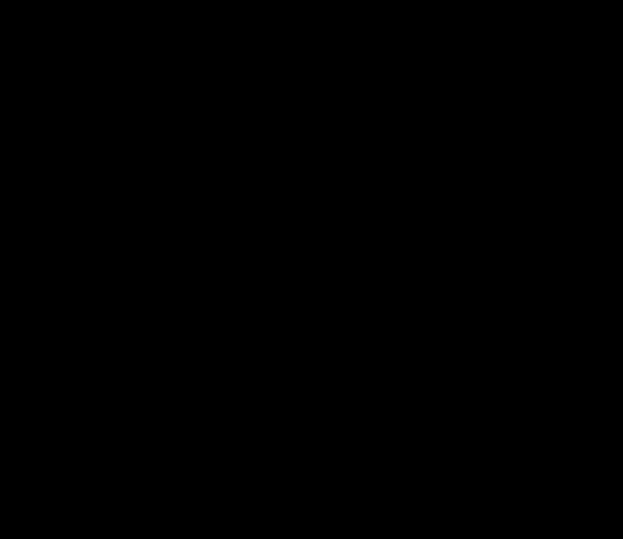

Supplement: f1 [file 6412562.f1.zip › CrackDataset/groundtruth/000000030.png]
