# Supplementary figures and images for: Automated Pavement Crack Damage Detection Using Deep Multiscale Convolutional Features (part 2 of 2)
Source: Hindawi journal article supplement (doi:10.1155/2020/6412562), 2020-01-08

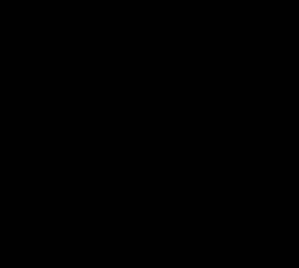

Supplement: f1 [file 6412562.f1.zip › CrackDataset/groundtruth/000000031.png]

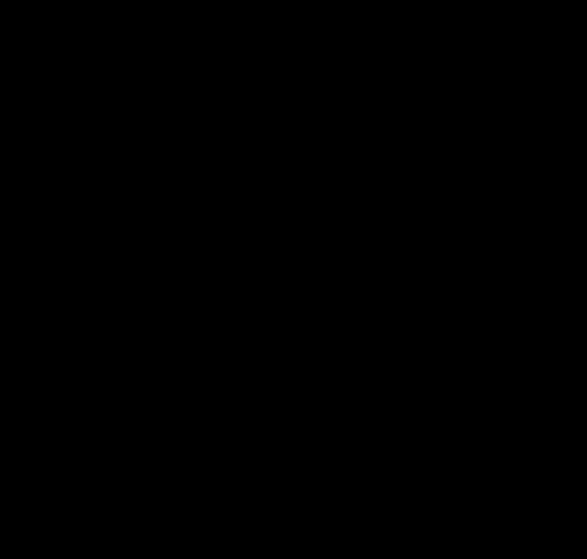

Supplement: f1 [file 6412562.f1.zip › CrackDataset/groundtruth/000000032.png]

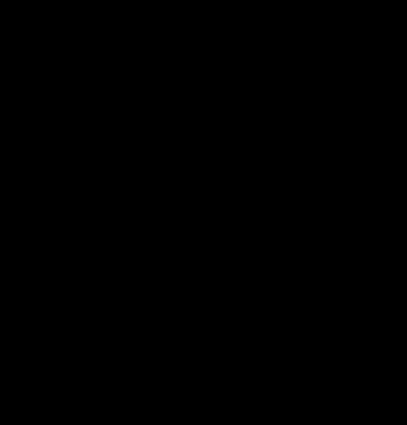

Supplement: f1 [file 6412562.f1.zip › CrackDataset/groundtruth/000000033.png]

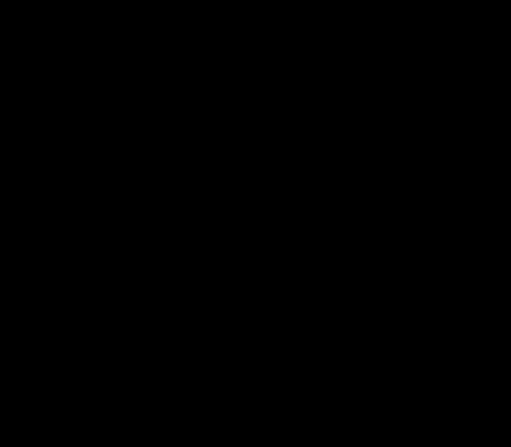

Supplement: f1 [file 6412562.f1.zip › CrackDataset/groundtruth/000000034.png]

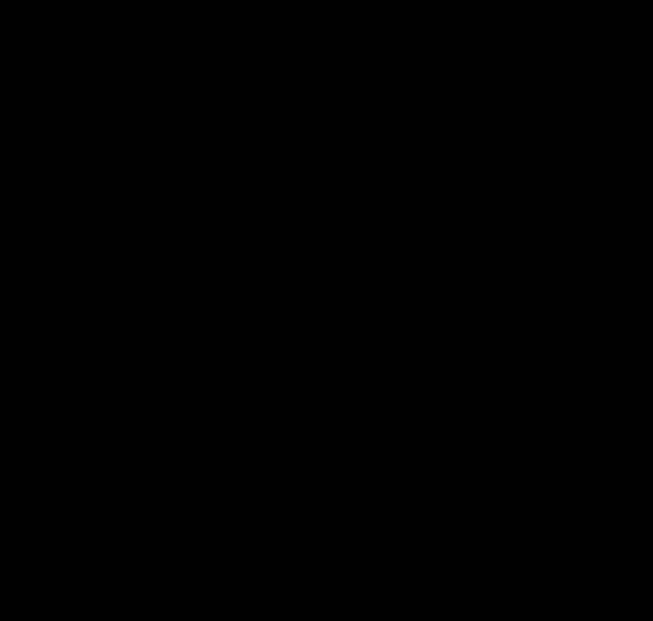

Supplement: f1 [file 6412562.f1.zip › CrackDataset/groundtruth/000000035.png]

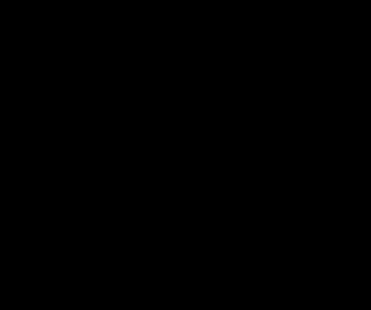

Supplement: f1 [file 6412562.f1.zip › CrackDataset/groundtruth/000000036.png]

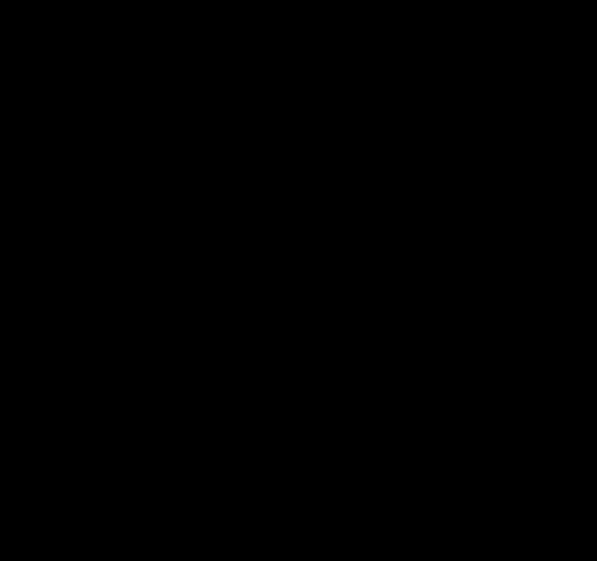

Supplement: f1 [file 6412562.f1.zip › CrackDataset/groundtruth/000000037.png]

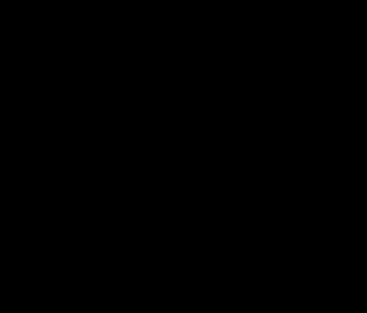

Supplement: f1 [file 6412562.f1.zip › CrackDataset/groundtruth/000000038.png]

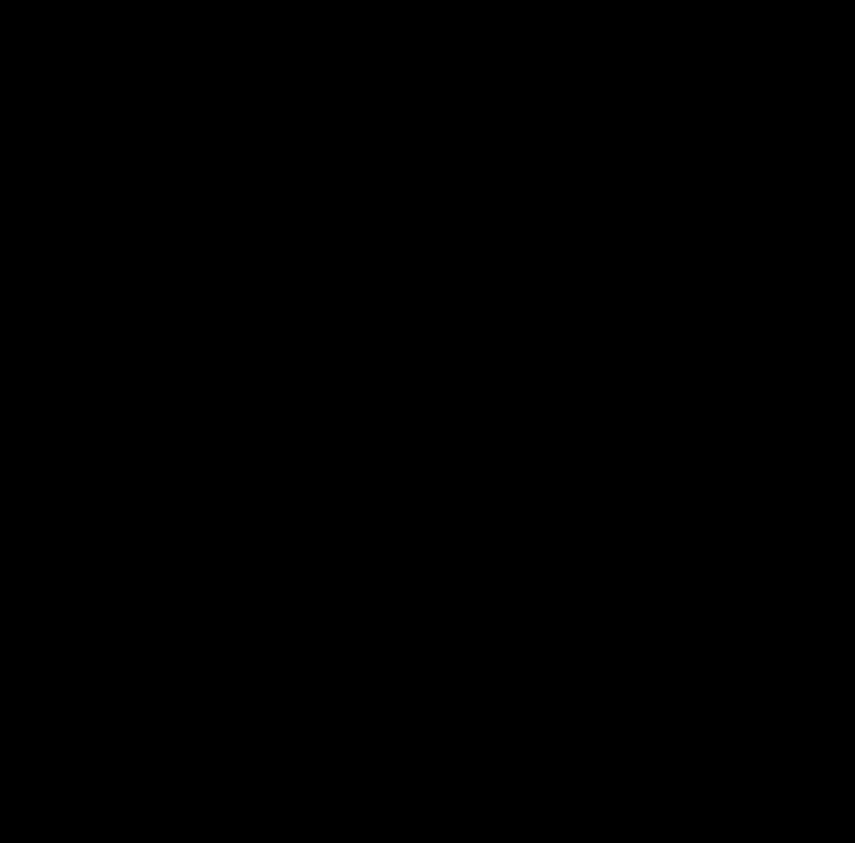

Supplement: f1 [file 6412562.f1.zip › CrackDataset/groundtruth/000000039.png]

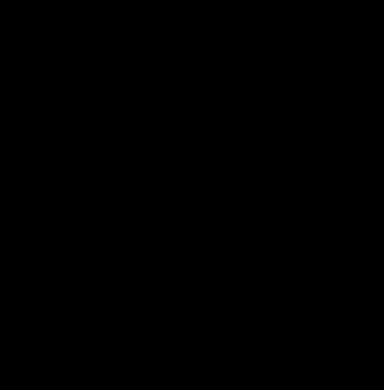

Supplement: f1 [file 6412562.f1.zip › CrackDataset/groundtruth/000000040.png]

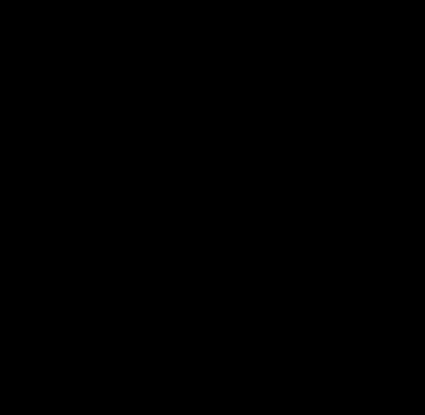

Supplement: f1 [file 6412562.f1.zip › CrackDataset/groundtruth/000000041.png]

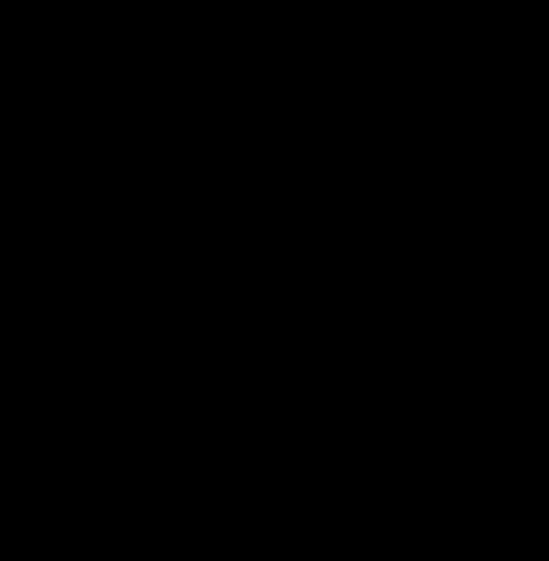

Supplement: f1 [file 6412562.f1.zip › CrackDataset/groundtruth/000000042.png]

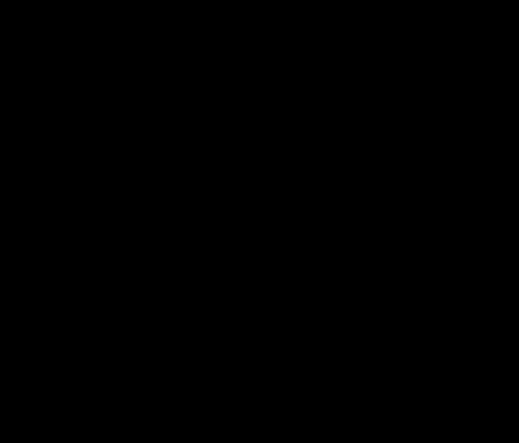

Supplement: f1 [file 6412562.f1.zip › CrackDataset/groundtruth/000000043.png]

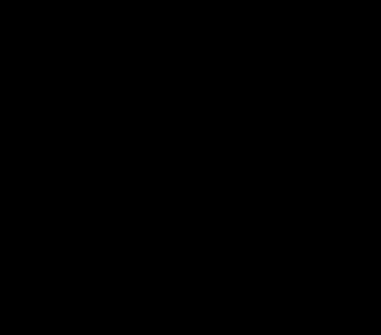

Supplement: f1 [file 6412562.f1.zip › CrackDataset/groundtruth/000000044.png]

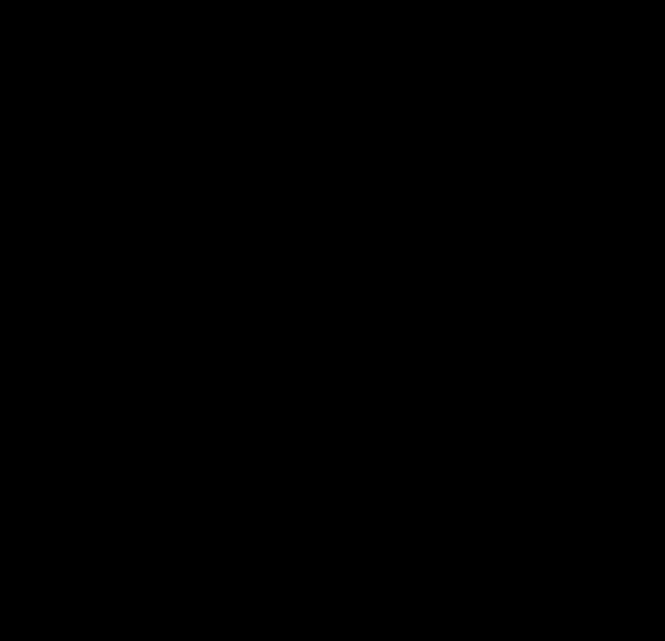

Supplement: f1 [file 6412562.f1.zip › CrackDataset/groundtruth/000000045.png]

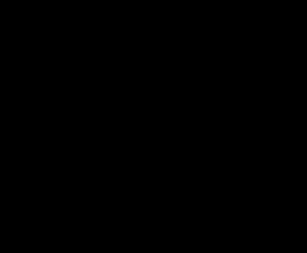

Supplement: f1 [file 6412562.f1.zip › CrackDataset/groundtruth/000000046.png]

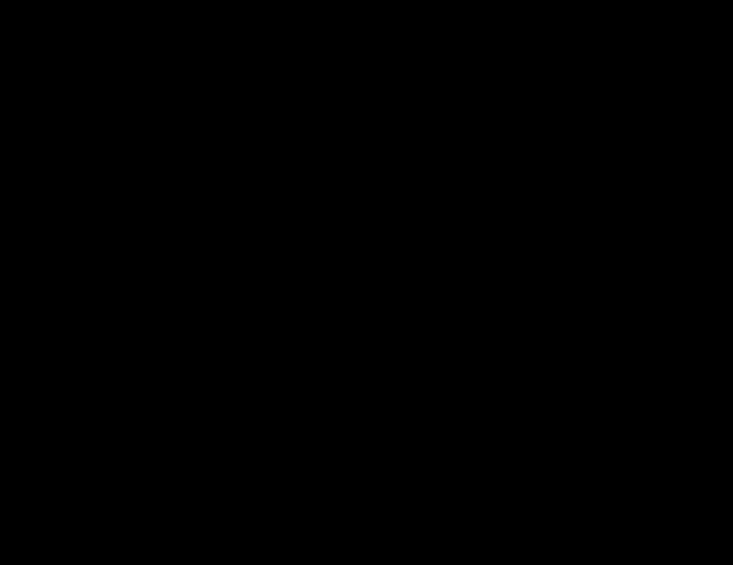

Supplement: f1 [file 6412562.f1.zip › CrackDataset/groundtruth/000000047.png]

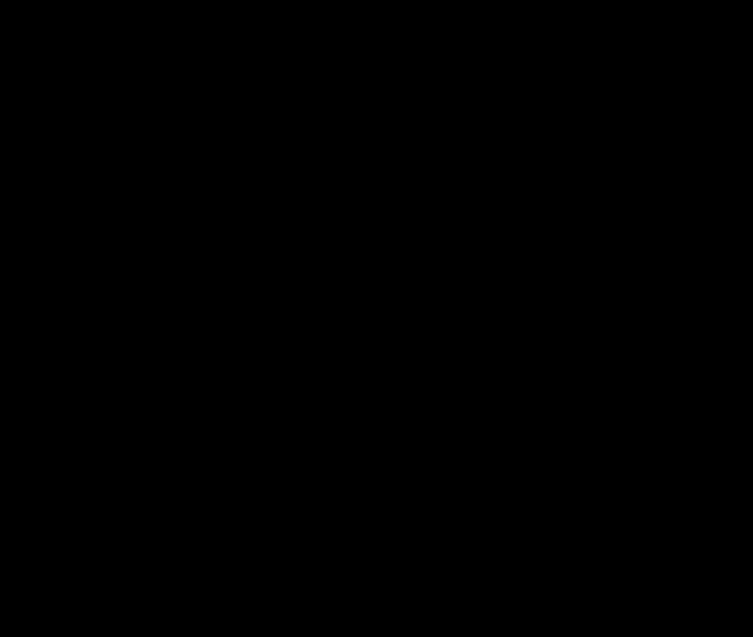

Supplement: f1 [file 6412562.f1.zip › CrackDataset/groundtruth/000000048.png]

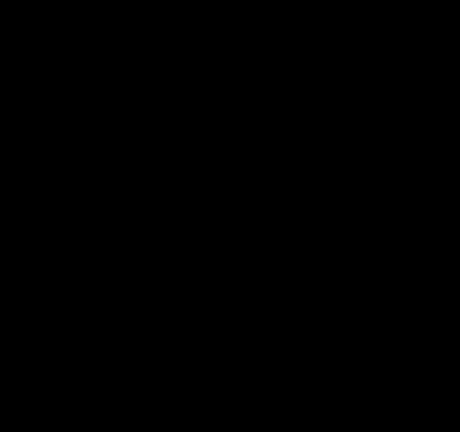

Supplement: f1 [file 6412562.f1.zip › CrackDataset/groundtruth/000000049.png]

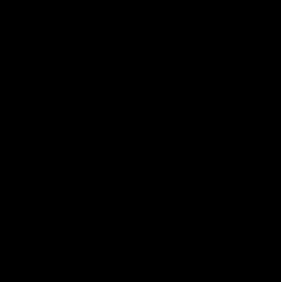

Supplement: f1 [file 6412562.f1.zip › CrackDataset/groundtruth/000000050.png]

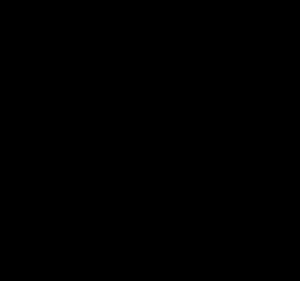

Supplement: f1 [file 6412562.f1.zip › CrackDataset/groundtruth/000000051.png]

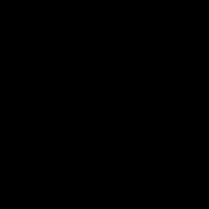

Supplement: f1 [file 6412562.f1.zip › CrackDataset/groundtruth/000000052.png]

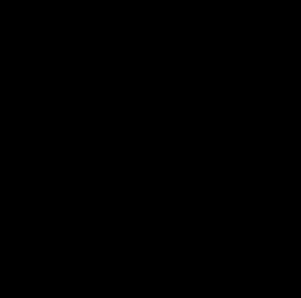

Supplement: f1 [file 6412562.f1.zip › CrackDataset/groundtruth/000000053.png]

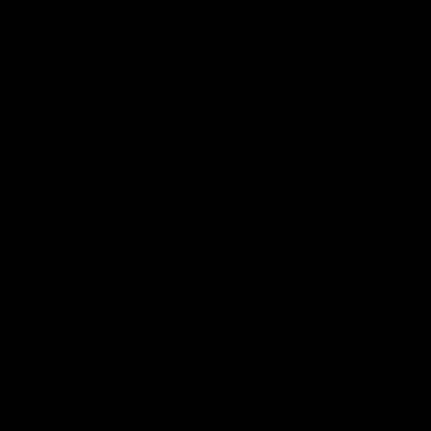

Supplement: f1 [file 6412562.f1.zip › CrackDataset/groundtruth/000000054.png]

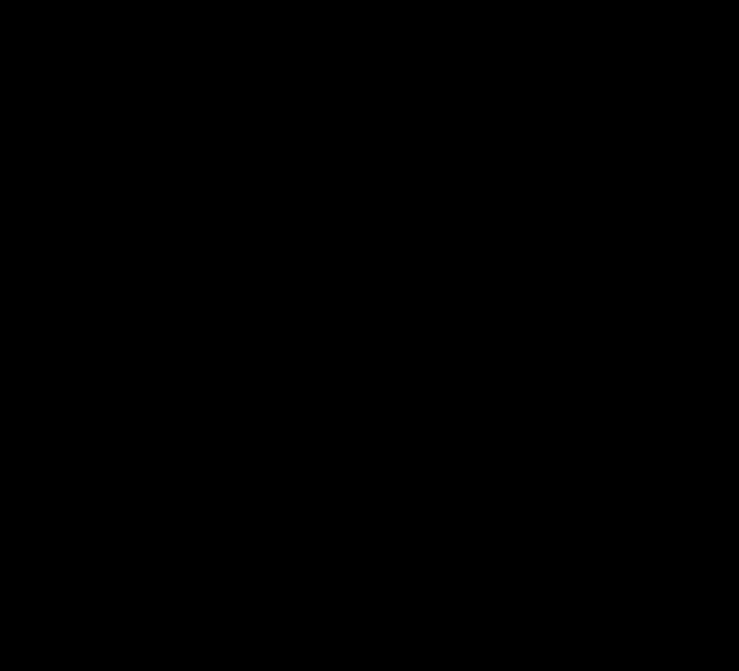

Supplement: f1 [file 6412562.f1.zip › CrackDataset/groundtruth/000000055.png]

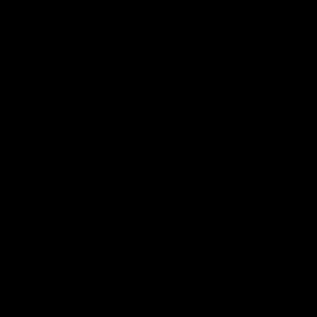

Supplement: f1 [file 6412562.f1.zip › CrackDataset/groundtruth/000000056.png]

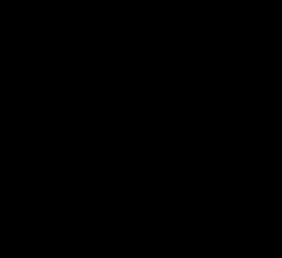

Supplement: f1 [file 6412562.f1.zip › CrackDataset/groundtruth/000000057.png]

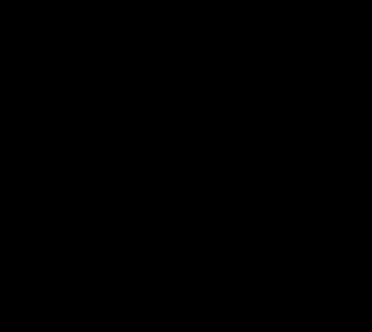

Supplement: f1 [file 6412562.f1.zip › CrackDataset/groundtruth/000000058.png]

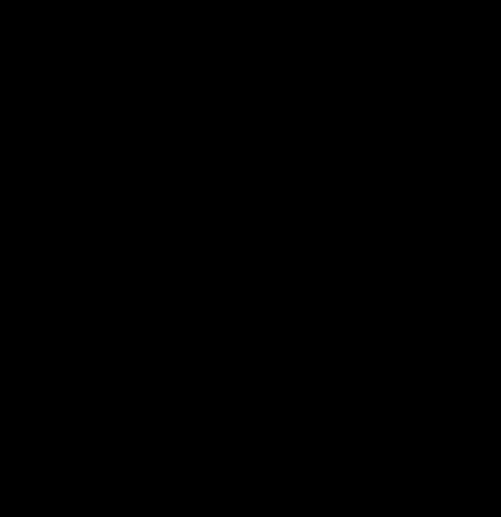

Supplement: f1 [file 6412562.f1.zip › CrackDataset/groundtruth/000000059.png]

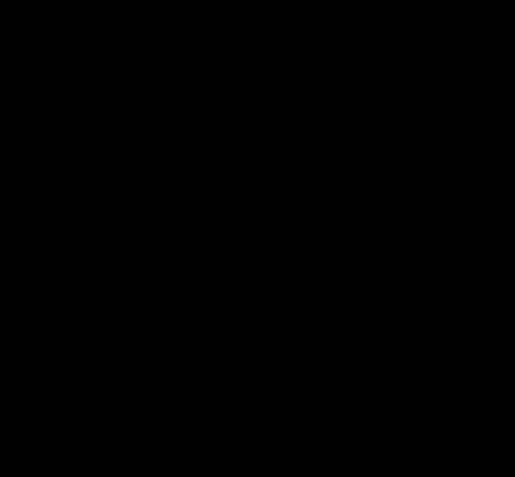

Supplement: f1 [file 6412562.f1.zip › CrackDataset/groundtruth/000000060.png]

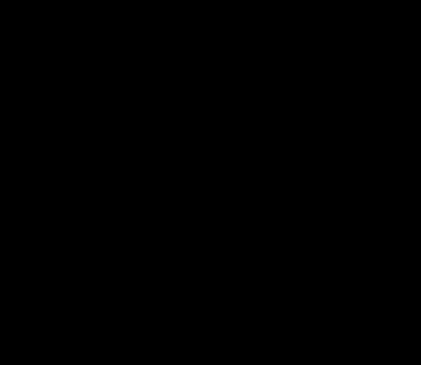

Supplement: f1 [file 6412562.f1.zip › CrackDataset/groundtruth/000000061.png]

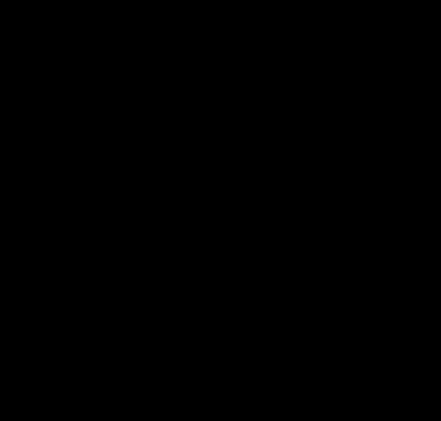

Supplement: f1 [file 6412562.f1.zip › CrackDataset/groundtruth/000000062.png]

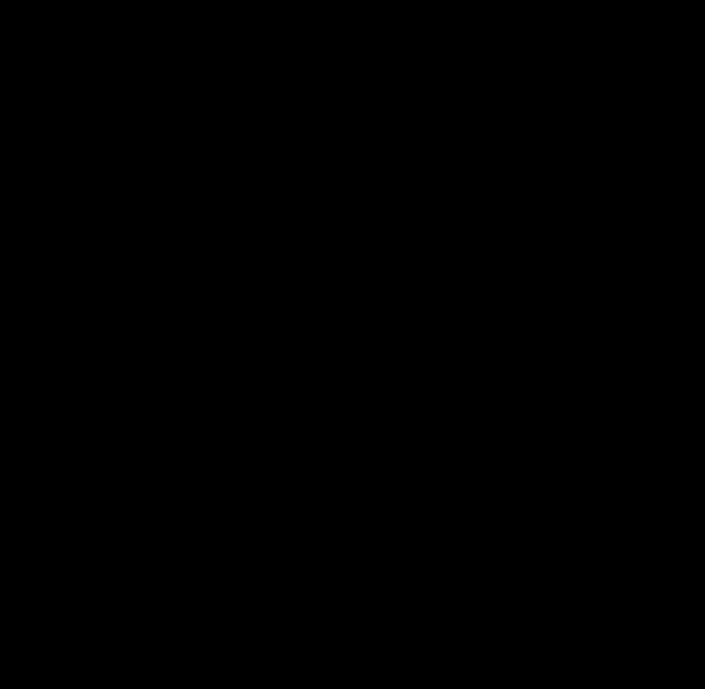

Supplement: f1 [file 6412562.f1.zip › CrackDataset/groundtruth/000000063.png]

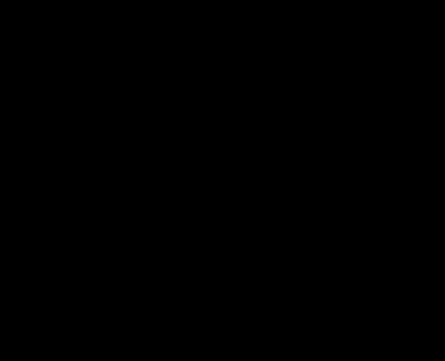

Supplement: f1 [file 6412562.f1.zip › CrackDataset/groundtruth/000000064.png]

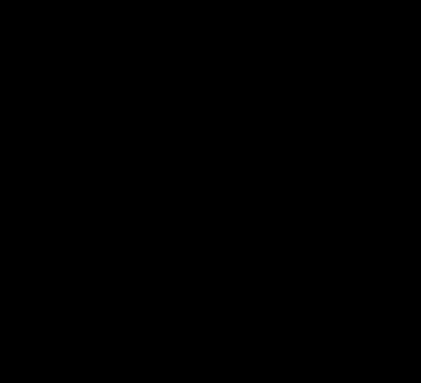

Supplement: f1 [file 6412562.f1.zip › CrackDataset/groundtruth/000000065.png]

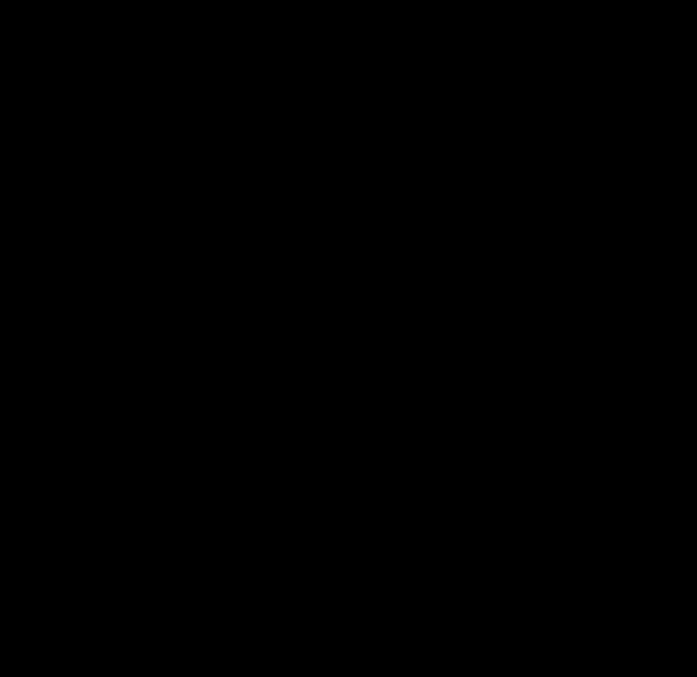

Supplement: f1 [file 6412562.f1.zip › CrackDataset/groundtruth/000000066.png]

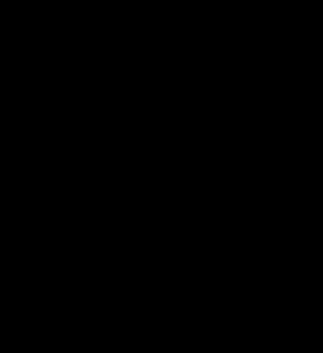

Supplement: f1 [file 6412562.f1.zip › CrackDataset/groundtruth/000000067.png]

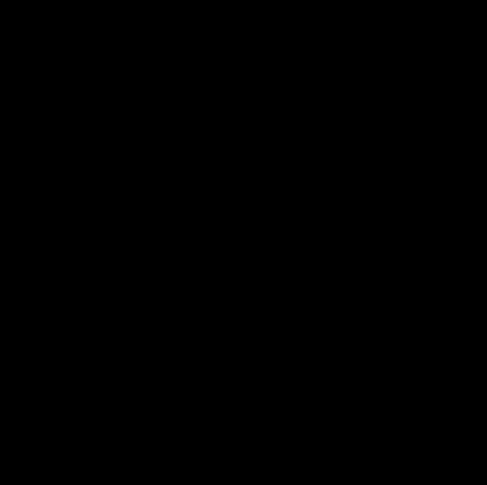

Supplement: f1 [file 6412562.f1.zip › CrackDataset/groundtruth/000000068.png]

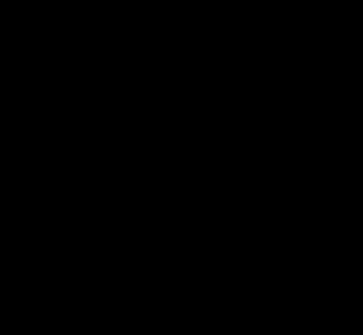

Supplement: f1 [file 6412562.f1.zip › CrackDataset/groundtruth/000000069.png]

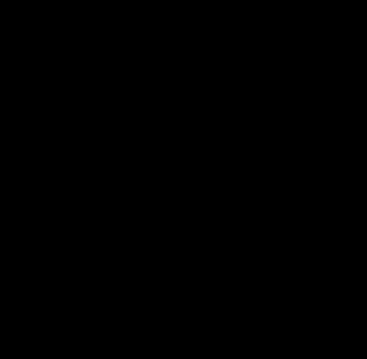

Supplement: f1 [file 6412562.f1.zip › CrackDataset/groundtruth/000000070.png]

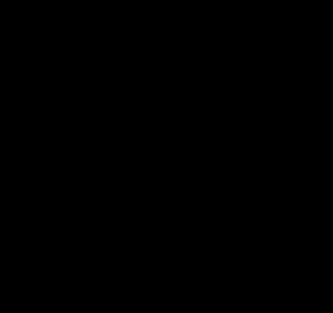

Supplement: f1 [file 6412562.f1.zip › CrackDataset/groundtruth/000000071.png]

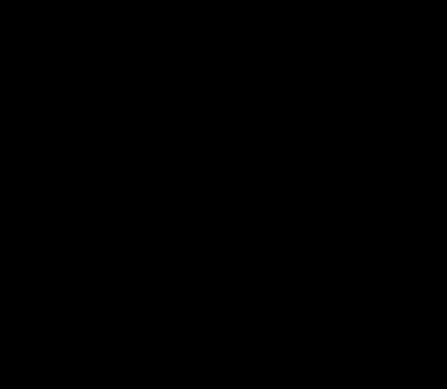

Supplement: f1 [file 6412562.f1.zip › CrackDataset/groundtruth/000000072.png]

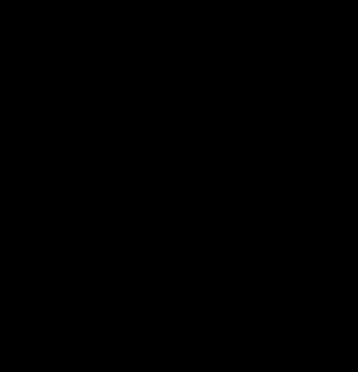

Supplement: f1 [file 6412562.f1.zip › CrackDataset/groundtruth/000000073.png]

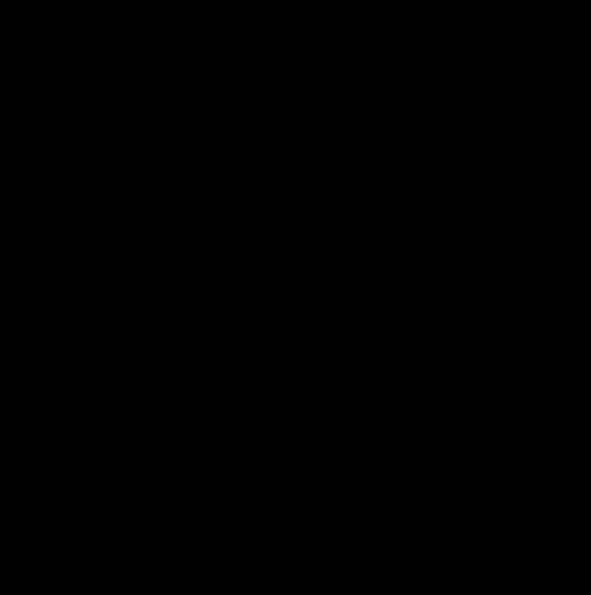

Supplement: f1 [file 6412562.f1.zip › CrackDataset/groundtruth/000000074.png]

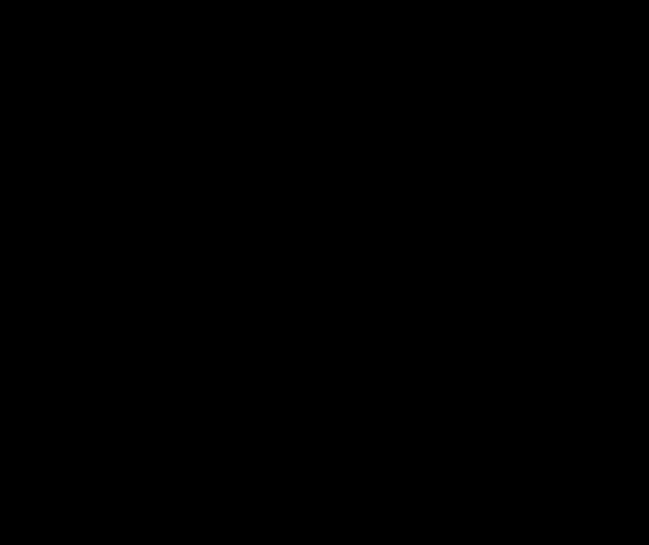

Supplement: f1 [file 6412562.f1.zip › CrackDataset/groundtruth/000000075.png]

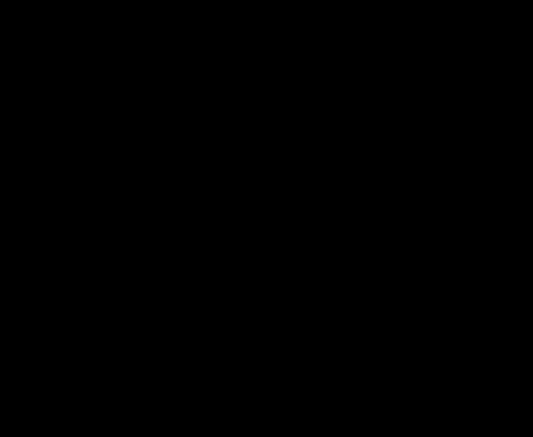

Supplement: f1 [file 6412562.f1.zip › CrackDataset/groundtruth/000000076.png]

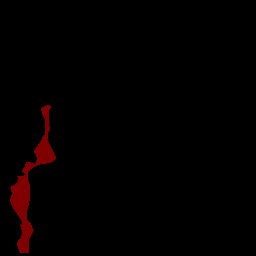

Supplement: f1 [file 6412562.f1.zip › CrackDataset/groundtruth/000001.png]

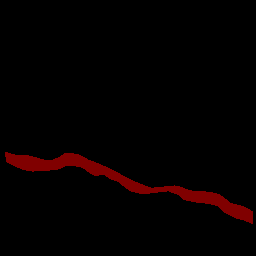

Supplement: f1 [file 6412562.f1.zip › CrackDataset/groundtruth/0000016.png]

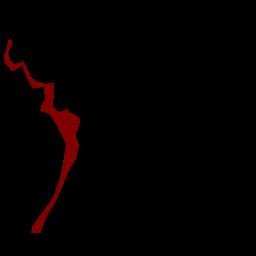

Supplement: f1 [file 6412562.f1.zip › CrackDataset/groundtruth/000002.png]

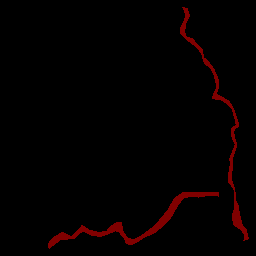

Supplement: f1 [file 6412562.f1.zip › CrackDataset/groundtruth/0000026.png]

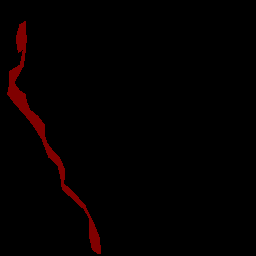

Supplement: f1 [file 6412562.f1.zip › CrackDataset/groundtruth/000003.png]

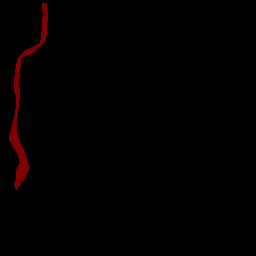

Supplement: f1 [file 6412562.f1.zip › CrackDataset/groundtruth/000004.png]

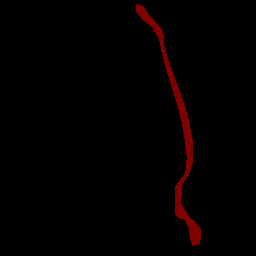

Supplement: f1 [file 6412562.f1.zip › CrackDataset/groundtruth/0000046.png]

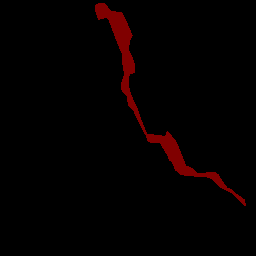

Supplement: f1 [file 6412562.f1.zip › CrackDataset/groundtruth/000005.png]

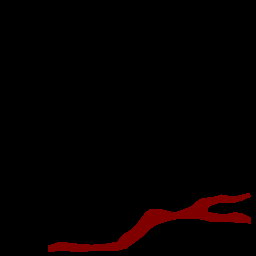

Supplement: f1 [file 6412562.f1.zip › CrackDataset/groundtruth/0000056.png]

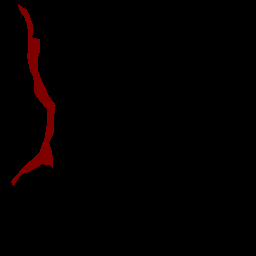

Supplement: f1 [file 6412562.f1.zip › CrackDataset/groundtruth/000006.png]

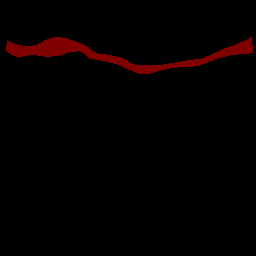

Supplement: f1 [file 6412562.f1.zip › CrackDataset/groundtruth/0000066.png]

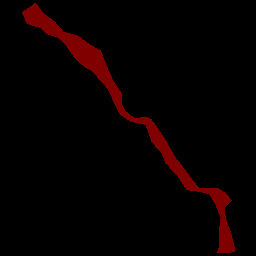

Supplement: f1 [file 6412562.f1.zip › CrackDataset/groundtruth/000007.png]

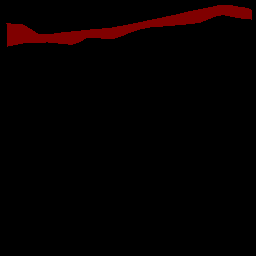

Supplement: f1 [file 6412562.f1.zip › CrackDataset/groundtruth/0000076.png]

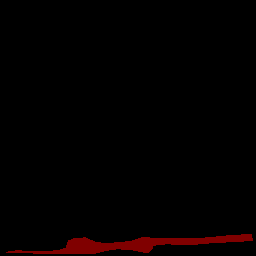

Supplement: f1 [file 6412562.f1.zip › CrackDataset/groundtruth/000008.png]

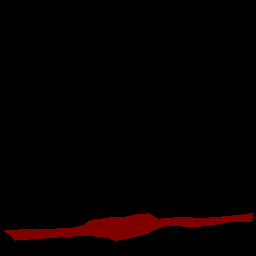

Supplement: f1 [file 6412562.f1.zip › CrackDataset/groundtruth/000009.png]

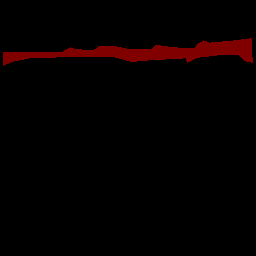

Supplement: f1 [file 6412562.f1.zip › CrackDataset/groundtruth/000010.png]

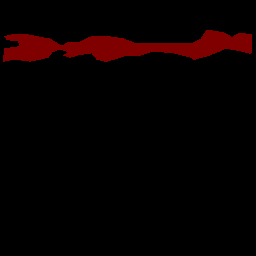

Supplement: f1 [file 6412562.f1.zip › CrackDataset/groundtruth/000011.png]

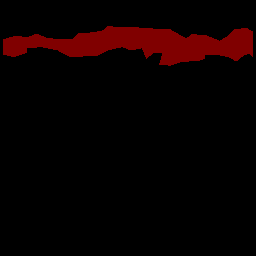

Supplement: f1 [file 6412562.f1.zip › CrackDataset/groundtruth/000012.png]

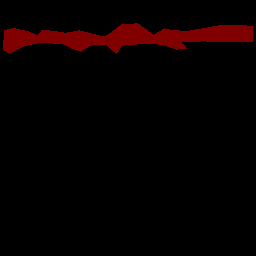

Supplement: f1 [file 6412562.f1.zip › CrackDataset/groundtruth/000013.png]

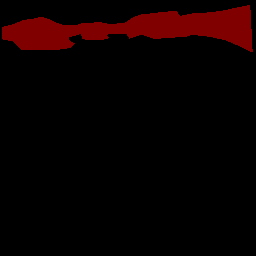

Supplement: f1 [file 6412562.f1.zip › CrackDataset/groundtruth/000014.png]

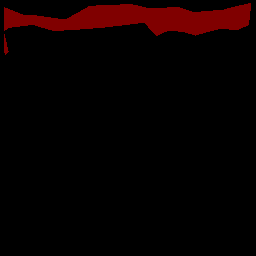

Supplement: f1 [file 6412562.f1.zip › CrackDataset/groundtruth/000015.png]

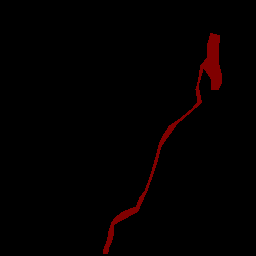

Supplement: f1 [file 6412562.f1.zip › CrackDataset/groundtruth/000017.png]

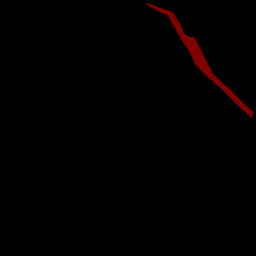

Supplement: f1 [file 6412562.f1.zip › CrackDataset/groundtruth/000018.png]

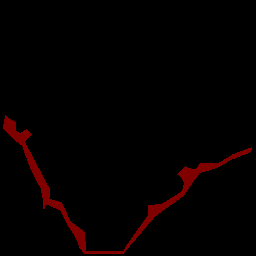

Supplement: f1 [file 6412562.f1.zip › CrackDataset/groundtruth/000019.png]

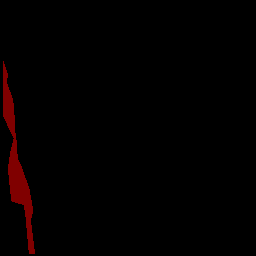

Supplement: f1 [file 6412562.f1.zip › CrackDataset/groundtruth/000020.png]

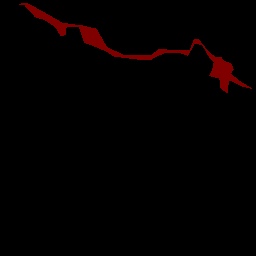

Supplement: f1 [file 6412562.f1.zip › CrackDataset/groundtruth/000021.png]

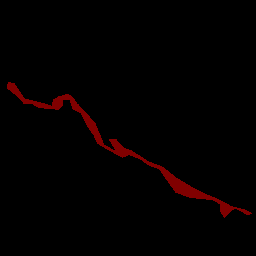

Supplement: f1 [file 6412562.f1.zip › CrackDataset/groundtruth/000022.png]

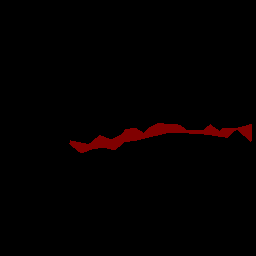

Supplement: f1 [file 6412562.f1.zip › CrackDataset/groundtruth/000023.png]

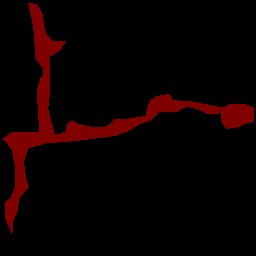

Supplement: f1 [file 6412562.f1.zip › CrackDataset/groundtruth/000024.png]

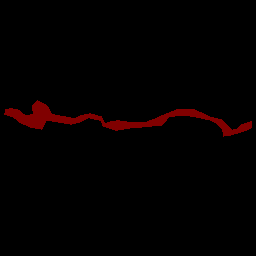

Supplement: f1 [file 6412562.f1.zip › CrackDataset/groundtruth/000025.png]

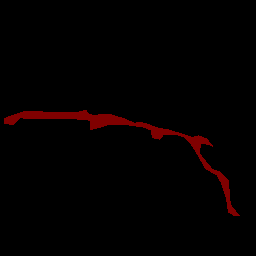

Supplement: f1 [file 6412562.f1.zip › CrackDataset/groundtruth/000026.png]

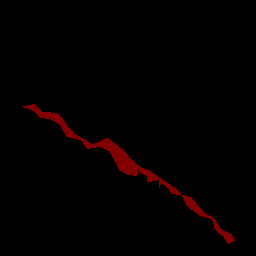

Supplement: f1 [file 6412562.f1.zip › CrackDataset/groundtruth/000028.png]

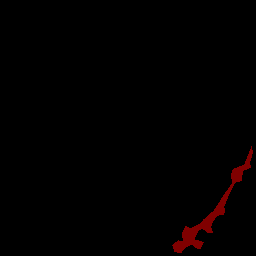

Supplement: f1 [file 6412562.f1.zip › CrackDataset/groundtruth/000029.png]

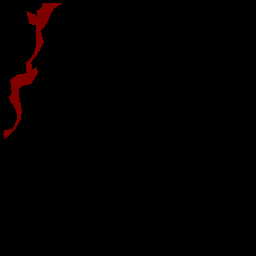

Supplement: f1 [file 6412562.f1.zip › CrackDataset/groundtruth/000030.png]

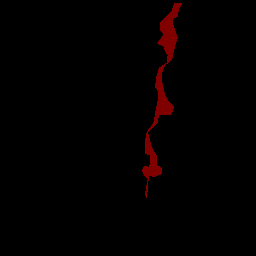

Supplement: f1 [file 6412562.f1.zip › CrackDataset/groundtruth/000031.png]

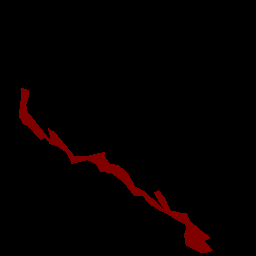

Supplement: f1 [file 6412562.f1.zip › CrackDataset/groundtruth/000032.png]

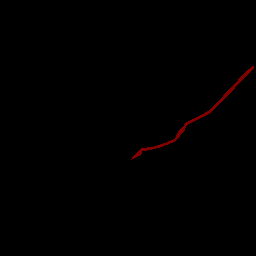

Supplement: f1 [file 6412562.f1.zip › CrackDataset/groundtruth/000034.png]

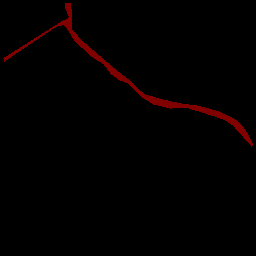

Supplement: f1 [file 6412562.f1.zip › CrackDataset/groundtruth/000035.png]

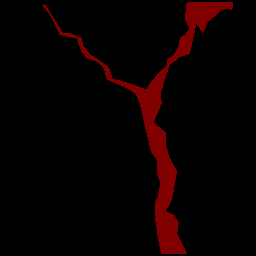

Supplement: f1 [file 6412562.f1.zip › CrackDataset/groundtruth/000036.png]

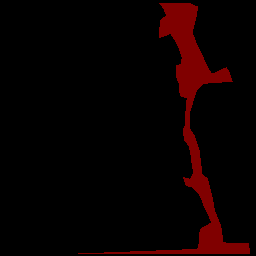

Supplement: f1 [file 6412562.f1.zip › CrackDataset/groundtruth/000037.png]

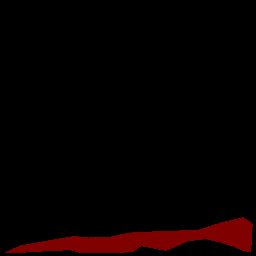

Supplement: f1 [file 6412562.f1.zip › CrackDataset/groundtruth/000038.png]

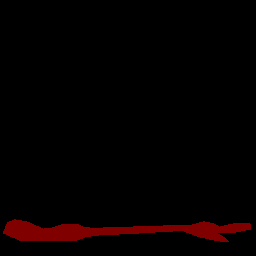

Supplement: f1 [file 6412562.f1.zip › CrackDataset/groundtruth/000039.png]

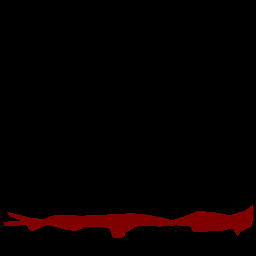

Supplement: f1 [file 6412562.f1.zip › CrackDataset/groundtruth/000040.png]

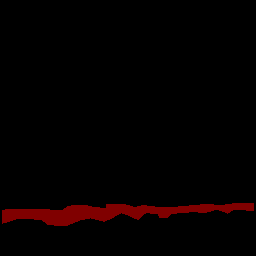

Supplement: f1 [file 6412562.f1.zip › CrackDataset/groundtruth/000041.png]

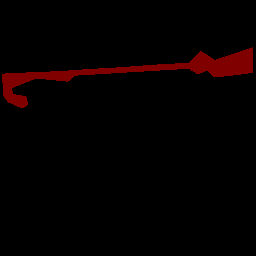

Supplement: f1 [file 6412562.f1.zip › CrackDataset/groundtruth/000042.png]

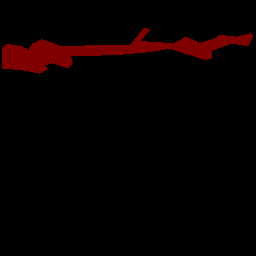

Supplement: f1 [file 6412562.f1.zip › CrackDataset/groundtruth/000043.png]

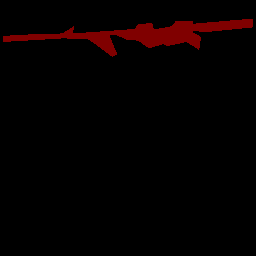

Supplement: f1 [file 6412562.f1.zip › CrackDataset/groundtruth/000044.png]

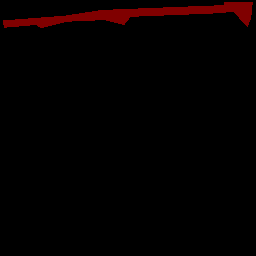

Supplement: f1 [file 6412562.f1.zip › CrackDataset/groundtruth/000045.png]

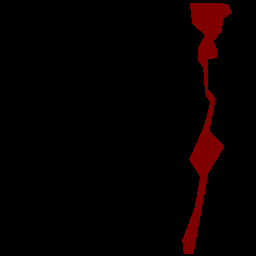

Supplement: f1 [file 6412562.f1.zip › CrackDataset/groundtruth/000046.png]

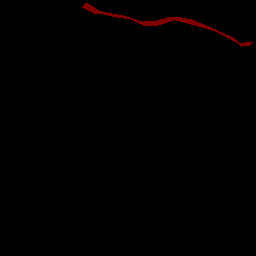

Supplement: f1 [file 6412562.f1.zip › CrackDataset/groundtruth/000047.png]
